# Supplementary material for: Evaluating Distribution and Prognostic Value of New Tumor-Infiltrating Lymphocytes in HCC Based on a scRNA-Seq Study With CIBERSORTx
Source: Front Med (Lausanne). 2020 Sep 17;7:451. doi: 10.3389/fmed.2020.00451 (PMC7527443; doi:10.3389/fmed.2020.00451)
Supplement: Supplementary Table 1 — Signature matrix with CIBERSORTx based on a scRNA-seq study (GSE98638). [file Table_1.XLSX]

## Sheet: Sheet1
Signature matrix with CIBERSORTx based on a scRNA-seq study(GSE98638)
The "1" values in the expression matrix txt files are genes with insufficient evidence of expression (these genes are either not expressed or have inadequate statistical power to be imputed).
NAME	CD8-SLC4A10	CD8-CX3CR1	CD8-LEF1	CD8-LAYN	CD8-GZMK	CD4-CCR7	CD4-GNLY	CD4-GZMA	CD4-CTLA4	CD4-FOXP3	CD4-CXCL13
A2M	229.97	191.452	55.0799	1	124.989	40.0999	158.092	111.264	1	1	1
A2M.AS1	180.389	97.089	1	1	1	1	78.5429	1	1	1	1
A2MP1	180.322	128.915	1	1	1	1	67.9748	1	1	1	1
AARS	1	1	1	61.5372	1	1	1	1	52.963	1	80.3669
AARSD1	1	1	85.8973	1	1	78.6402	1	1	1	1	57.7422
ABCA11P	1	1	66.7766	1	35.2567	46.7313	1	37.6457	1	1	1
ABCA2	1	1	1	35.0296	1	1	30.6175	1	1	1	1
ABCA7	31.1524	1	33.8227	1	1	34.5946	1	28.4733	1	1	1
ABCB1	210.504	1	1	116.46	80.0937	1	1	62.5767	1	1	1
ABCB6	1	1	1	1	1	1	1	1	1	1	45.1137
ABCB7	1	1	1	1	1	1	1	62.0684	64.8025	1	1
ABCD2	1	1	80.6698	38.3986	1	53.5436	1	1	1	1	32.7409
ABCF2	85.5649	1	77.8298	59.4059	1	70.9869	61.2114	64.6755	52.9574	1	1
ABCG1	1	1	1	66.4118	1	1	1	1	57.9479	1	1
ABHD10	1	1	1	55.381	1	73.5911	70.9342	1	86.5232	1	57.0892
ABHD12	1	61.9135	1	68.3331	56.5209	1	1	1	57.4273	1	63.7308
ABHD13	39.1901	1	1	1	51.7775	1	54.4353	55.0623	44.284	56.4602	1
ABHD17A	1	1	1	1	1	1	26.4112	1	1	1	1
ABHD2	1	31.0704	1	29.2106	1	1	32.3954	1	30.5315	39.9919	32.0532
ABHD4	1	1	1	1	1	1	1	1	60.8349	1	1
ABI2	1	1	1	1	1	1	1	1	48.5829	1	1
ABI3	281.828	434	1	386.708	261.972	1	265.153	117.248	107.789	1	85.7798
ACAD11	1	1	1	48.6591	1	1	67.4091	1	48.5002	1	1
ACAD8	68.0439	58.1629	47.5728	45.5816	1	60.1221	53.4926	1	1	71.4341	1
ACAD9	54.9775	45.2786	63.3953	50.2703	1	1	1	1	51.5415	1	43.8544
ACADS	1	1	65.7202	49.5192	1	1	1	1	1	1	1
ACBD5	57.3666	57.8958	1	45.2121	59.2042	1	86.5882	54.9746	40.3913	1	1
ACOT2	1	1	1	35.5836	1	1	1	1	37.5741	1	29.439
ACOT7	1	1	1	89.9256	1	1	1	1	1	1	115.048
ACOT8	1	1	60.0241	44.1348	1	1	1	1	42.47	57.6999	42.8904
ACOT9	1	1	1	108.88	108.001	1	75.1789	1	185.076	121.057	83.1337
ACP2	1	1	1	1	1	1	1	1	61.5493	1	1
ACP5	1	1	1	348.083	93.0263	1	1	71.3093	552.756	110.755	122.163
ACP6	1	1	1	1	1	1	1	40.9651	1	1	1
ACSF3	1	1	1	37.1839	1	1	1	1	1	1	1
ACSL3	72.9116	1	1	55.5798	1	1	1	1	1	1	47.0144
ACSL4	1	1	1	52.8355	1	1	1	1	80.4128	1	34.0551
ACSS1	1	1	48.2307	1	1	1	1	1	1	1	1
ACTA2	1	1	1	65.1628	64.6825	1	1	1	104.881	87.9265	74.2732
ACTN1	1	1	122.162	1	1	71.2093	1	1	1	1	1
ACTR3C	1	1	1	1	1	1	1	1	39.9851	1	28.4977
ADAM12	34.2368	1	1	1	1	1	1	1	1	1	1
ADAM19	37.6663	1	1	26.0672	32.1307	50.5673	24.1167	119.369	35.5119	49.3591	171.882
ADAT1	70.698	1	76.6475	1	59.5429	1	1	58.8391	1	1	1
ADAT2	1	1	1	1	1	1	1	1	37.567	1	1
ADCY3	1	1	1	1	1	1	1	1	42.313	1	1
ADGRG1	1	464.741	1	236.4	1	1	360.054	1	1	1	155.083
ADGRG5	1	123.721	1	69.7898	1	1	86.7082	1	1	1	1
ADHFE1	120.414	153.617	1	64.8296	108.808	1	119.053	76.9425	1	117.903	1
ADI1	1	1	1	1	1	56.6955	1	64.371	90.2287	73.7886	96.8124
ADORA2A.AS1	23.8168	1	1	22.873	1	1	1	1	24.2556	1	1
ADPGK.AS1	29.5119	1	24.0917	21.1139	1	21.9677	19.399	1	1	1	1
ADPRH	1	1	1	1	1	1	1	1	53.4754	1	1
ADPRHL2	108.773	120.685	1	95.8218	1	1	154.726	87.0708	1	1	118.385
ADPRM	1	1	127.009	1	1	197.601	1	1	1	1	52.2235
ADRB2	473.422	685.656	1	1	202.493	1	725.523	249.845	1	1	1
ADTRP	1	1	1	1	1	1	1	1	50.319	54.1263	1
AEN	1	1	1	1	1	1	1	1	69.0441	1	1
AFAP1L2	1	1	1	96.4268	1	1	1	1	1	1	1
AFG3L2	1	1	46.6137	51.8413	1	1	1	1	1	1	1
AGAP2	45.1995	26.7823	1	31.4497	1	1	1	1	1	32.8256	28.3865
AGO2	1	1	1	29.9662	1	1	1	1	38.2315	1	1
AGO3	1	1	1	1	41.9085	1	1	1	1	1	1
AGPAT2	1	1	1	65.3766	1	1	1	1	62.9291	1	1
AGTPBP1	45.1139	94.5334	1	1	44.7727	1	67.5926	1	1	46.3197	1
AHI1	1	1	1	50.3075	1	1	1	1	1	1	60.1391
AHR	1	1	1	1	1	1	1	50.002	68.4656	1	32.3102
AHRR	1	1	16.061	1	1	1	1	1	14.4126	15.2317	1
AIFM1	1	1	1	42.2385	1	1	1	1	43.6397	1	1
AIMP2	1	1	1	61.0613	1	1	1	1	64.259	1	93.9901
AK1	1	50.9037	1	51.5926	1	1	1	1	38.0646	39.1027	40.1943
AKAP11	1	1	1	1	1	1	1	1	1	1	28.1416
AKAP2	1	1	1	24.2949	1	1	1	1	1	41.9318	1
AKAP5	1	1	1	76.7594	1	1	1	1	1	1	1
AKIP1	1	1	1	1	1	1	1	1	83.745	1	1
AKR1C3	1	1	1	1	1	1	78.032	1	1	1	1
ALAS1	104.306	1	1	83.8217	1	1	1	85.6223	93.6801	97.6603	89.1881
ALDH18A1	1	70.389	1	69.8265	1	1	1	1	1	1	74.2765
ALDH3A2	1	1	1	62.7542	1	1	1	1	66.9534	61.4589	1
ALG1	41.1588	39.3168	1	33.6411	1	1	1	1	36.6739	1	1
ALG2	76.8904	1	1	1	1	1	1	72.3762	1	1	1
ALG6	1	1	67.7407	47.4173	55.4088	1	44.6699	57.5067	1	81.8513	66.1085
ALG8	1	1	91.8871	74.3456	1	1	1	1	92.6891	1	75.228
ALKBH3	1	1	116.639	1	1	1	105.447	1	1	1	1
ALKBH7	56.6047	41.2976	105.115	59.902	1	95.731	1	1	1	1	62.0501
ALOX12.AS1	1	1	43.707	1	1	1	1	1	1	1	1
AMIGO2	1	1	1	41.0032	1	1	1	1	1	1	1
AMPD2	73.7319	1	1	1	1	1	1	49.5379	1	1	1
ANAPC1P1	28.5387	111.809	126.709	112.232	85.7727	1	1	1	1	1	1
ANK3	1	1	1	1	1	26.8788	1	1	1	1	1
ANKH	1	1	1	1	1	31.6931	1	1	24.2919	46.5471	1
ANKLE2	1	52.3491	1	1	1	1	1	1	32.8129	1	32.0207
ANKRD13A	40.7108	1	1	1	1	35.1123	1	1	1	1	1
ANKRD13D	1	1	1	33.474	42.3177	34.5794	43.2788	34.8278	1	1	1
ANKRD28	1	1	1	1	1	1	1	26.3089	1	1	1
ANKRD37	1	1	1	1	56.5983	1	1	59.0999	1	1	1
ANKRD40	40.3033	1	1	1	1	39.341	46.5267	1	1	1	1
ANKRD49	1	59.6678	51.3796	37.6654	60.5871	58.2773	56.0022	44.1428	1	111.248	1
ANO9	81.4218	1	76.4095	1	71.1376	74.8973	1	76.7581	56.4603	83.8324	1
ANTXR2	39.1294	1	1	1	1	42.1538	92.8066	94.1291	43.4962	72.5399	36.1402
ANXA4	1	68.6444	1	1	1	1	67.611	1	60.0269	1	1
AOAH	134.056	664.53	103.53	190.783	611.812	1	114.161	144.793	1	1	96.9845
AOAH.IT1	1	1	1	1	58.2372	1	1	1	1	1	1
AP1S1	1	1	1	1	1	1	1	1	1	1	63.2824
AP3D1	51.26	1	51.609	42.6483	1	1	1	46.0732	36.6085	1	29.8822
AP3M2	1	1	1	1	1	74.8839	1	65.9288	1	1	65.222
AP5Z1	1	1	31.155	23.4093	1	1	33.6869	1	23.5024	1	1
APBA2	1	70.7505	115.873	1	71.5242	64.839	1	1	1	1	1
APBB1	73.5089	1	74.3239	1	47.8921	68.2423	1	45.4775	40.0463	58.2788	1
APBB3	1	1	75.599	1	1	73.0961	1	1	1	1	1
APC	1	25.006	1	1	1	1	1	1	1	1	1
APEX2	1	1	1	65.3954	1	1	1	1	63.9109	1	1
APH1A	52.7374	1	61.7847	65.1371	59.0167	1	91.3231	1	1	63.3776	44.5586
APOBEC3F	1	21.5707	1	45.6709	33.8384	1	1	1	30.6985	1	27.322
APOBEC3H	1	1	1	106.772	1	1	1	129.045	1	1	158.466
APOL1	1	67.8427	1	78.2292	48.0035	1	77.4187	54.3183	65.5644	1	74.6411
APOPT1	89.1323	75.9321	1	63.4014	1	1	86.0546	1	72.2289	73.6006	66.3334
APPBP2	1	35.4706	1	32.9765	1	1	1	1	28.1744	1	31.0095
APTX	1	1	1	1	1	62.4293	1	1	55.0052	1	67.1959
AQP3	245.218	1	178.776	1	1	319.539	1	144.135	101.787	306.696	1
AREL1	1	1	1	1	1	1	35.5884	1	1	1	1
ARFGAP1	1	1	1	1	1	1	38.4608	1	1	1	1
ARFGEF2	1	1	28.0344	1	1	1	1	1	1	1	20.2632
ARFIP1	1	1	1	52.8712	1	1	1	1	1	1	1
ARFIP2	64.8007	1	1	1	1	1	1	1	1	53.1063	42.769
ARHGAP12	1	47.7993	1	1	1	1	42.816	1	1	1	1
ARHGAP17	1	1	1	1	1	1	1	1	17.9858	1	1
ARHGAP18	71.3899	1	1	67.9417	95.6456	1	1	61.7932	49.7893	1	56.7549
ARHGAP26	1	1	1	1	28.5173	1	27.8852	1	1	1	1
ARHGAP27	1	26.6789	30.2986	25.873	1	1	1	1	1	35.258	1
ARHGAP35	24.5498	1	1	1	28.486	1	1	35.8237	1	1	31.1431
ARHGAP5	1	1	1	1	1	40.7338	1	1	1	1	1
ARHGEF12	1	1	1	1	1	1	1	1	26.3107	1	1
ARHGEF18	1	1	50.1176	1	1	51.5929	1	1	1	54.8509	1
ARHGEF2	1	32.8727	1	1	1	31.4496	44.3546	26.1233	30.8704	32.6992	1
ARHGEF7	1	1	1	1	1	1	1	25.6776	1	1	1
ARL1	1	1	1	79.9089	1	1	1	65.4024	65.3468	1	45.0364
ARL15	1	1	1	1	1	1	1	1	1	1	46.1053
ARL3	1	1	1	41.616	1	1	1	1	1	1	1
ARMC6	1	75.679	1	1	1	1	72.686	1	1	1	41.0153
ARMCX3	1	1	1	55.4304	69.0497	1	69.0717	77.3203	54.2172	1	77.5869
ARMCX6	1	1	1	37.9871	1	1	1	1	1	1	1
ARMT1	1	1	1	1	1	1	1	1	1	1	46.8067
ARRDC2	1	60.2116	1	1	1	1	1	1	1	59.236	1
ASB2	1	1	1	93.5408	1	1	1	1	112.544	1	114.089
ASB3	70.7362	1	77.1602	69.0018	50.0839	1	1	1	57.6846	54.4589	68.4808
ASF1B	1	1	1	101.099	1	1	1	1	1	1	134.641
ASH2L	1	64.9287	82.1367	93.3436	1	64.5718	1	71.2514	61.4379	1	67.2328
ASL	1	1	1	45.671	1	1	1	1	1	1	1
ASUN	1	70.8274	1	42.9303	1	77.0621	1	91.7901	60.9349	76.9877	68.2464
ASXL1	1	1	1	1	1	1	1	1	24.1786	1	1
ATAD2	1	1	1	36.5027	1	1	1	1	1	1	32.2562
ATE1	1	47.8001	1	46.2177	1	1	45.7274	1	46.4499	72.6789	1
ATF1	65.4858	1	92.9178	1	1	66.8835	44.637	1	52.6454	71.8305	43.4283
ATF6B	1	20.224	1	18.7727	26.0591	23.5819	20.5051	23.8844	1	24.094	1
ATF7	1	1	1	22.9826	1	1	29.3442	36.6648	1	1	15.1949
ATF7IP2	62.6883	1	1	1	1	1	1	48.9949	1	1	1
ATG101	1	1	1	68.4561	111.297	1	1	1	1	1	85.4489
ATG7	1	52.7112	1	37.2678	1	1	1	1	36.8678	1	1
ATG9A	1	1	1	45.543	1	1	59.9699	39.0876	1	1	55.2499
ATP10D	1	1	1	31.4583	1	1	1	1	1	1	1
ATP13A3	1	1	1	1	1	1	1	1	29.1346	1	1
ATP1B1	1	1	1	1	1	1	1	59.0061	121.611	1	1
ATP2C1	1	1	1	27.604	1	1	29.4477	1	44.6214	1	1
ATP5SL	1	82.8263	1	57.2489	1	1	60.6122	1	1	1	71.5457
ATP6V0A1	1	1	1	1	1	1	1	1	30.9777	1	1
ATP6V1A	1	1	1	59.0887	51.5194	1	61.5942	55.9433	64.3471	1	74.1312
ATP6V1C1	1	1	1	33.1271	1	1	35.1068	1	32.679	1	39.5245
ATP8A1	1	51.3928	31.3602	72.587	62.9905	1	1	1	1	1	33.8651
ATP8B4	1	1	1	29.1471	1	1	1	1	1	1	1
ATP9B	1	1	25.0524	1	1	1	1	1	1	1	1
ATR	1	30.1953	41.0566	1	1	26.5417	31.9298	1	1	1	1
ATXN1	1	20.7956	1	31.8679	32.0187	1	26.5416	30.2247	1	22.075	34.1743
ATXN7L1	1	1	1	1	1	33.5652	1	1	1	39.8726	1
AUH	1	1	1	61.164	1	1	1	1	78.372	1	1
AURKB	1	1	1	1	1	1	1	1	1	1	145.451
AXIN1	62.7812	66.0926	1	1	1	1	48.3404	1	1	1	1
B3GALT2	74.5184	1	1	1	1	1	1	1	1	1	1
B3GNT2	107.018	95.6372	99.3192	172.556	149.475	1	1	1	94.9329	136.226	1
B3GNTL1	29.181	27.6266	1	36.9807	43.8216	1	1	37.9734	1	36.7246	31.4809
BACH1	1	1	1	1	1	1	1	1	41.276	1	1
BAD	43.8226	52.4841	1	41.5969	1	1	50.9417	60.5316	57.2345	1	55.8197
BAG4	1	1	1	36.9386	50.7196	1	1	1	44.3869	1	1
BAG5	46.2826	1	58.3017	1	1	47.7541	1	1	1	1	1
BANP	1	1	1	1	53.9717	1	1	1	1	1	1
BARD1	1	1	1	44.3559	1	1	1	1	52.2519	1	1
BAX	1	37.9915	1	52.8479	1	1	1	55.8414	62.7642	1	52.7387
BAZ2B	59.0965	36.5314	40.8988	1	40.606	1	44.4809	31.7873	1	1	1
BBS1	1	1	1	22.2204	1	1	1	1	1	1	31.8086
BBS2	59.0729	46.3759	47.8319	1	42.1015	78.0088	58.9182	1	1	51.6268	1
BCAP29	1	1	1	34.152	1	1	1	1	1	1	1
BCAS3	1	43.1971	1	1	1	1	1	1	1	1	1
BCKDK	1	1	1	62.2092	1	1	1	1	63.9644	1	87.4596
BCL2	46.1447	1	37.1182	1	1	40.3598	1	31.3973	38.13	1	1
BCL2A1	128.635	1	128.127	1	118.001	148.376	128.748	135.735	1	1	1
BCL2L1	122.896	96.0041	1	81.8488	93.2916	1	68.4086	122.638	159.188	1	112.587
BCL2L11	1	1	1	94.0731	1	1	1	1	34.1305	64.1422	54.3336
BCL2L2.PABPN1	40.7567	1	1	1	1	34.9676	39.1813	1	1	1	1
BCL3	1	1	1	1	1	1	1	1	47.6466	1	1
BCL7C	1	1	1	1	1	1	68.7895	1	1	1	1
BCL9L	1	1	23.3581	1	1	1	1	1	1	1	1
BCOR	1	1	1	34.4292	1	1	1	1	34.6418	1	1
BDH2	1	1	1	1	1	1	1	1	44.6857	1	1
BEX2	1	1	75.5117	1	1	109.802	1	1	1	1	1
BEX3	1	1	84.534	1	1	102.872	1	1	300.381	133.588	1
BEX4	114.34	1	222.118	1	1	176.318	1	1	1	115.451	1
BHLHE40	153.05	120.556	1	130.111	89.9536	1	169.589	291.376	97.6395	1	252.575
BHLHE40.AS1	1	1	1	32.3231	1	1	27.261	60.5586	68.045	1	181.877
BIRC5	1	1	1	1	1	1	1	1	1	1	64.6993
BLMH	1	1	108.448	54.8972	1	1	1	1	1	1	67.9654
BLOC1S4	1	80.5258	100.445	1	82.4963	80.2865	71.3609	75.1284	1	113.768	1
BLOC1S5	1	1	70.5042	1	1	1	1	1	1	1	1
BLVRA	1	1	1	89.0441	1	100.432	96.883	1	1	118.641	217.021
BLZF1	1	63.2129	1	46.7301	71.0365	1	81.1027	48.3766	51.5471	80.3312	1
BMI1	1	1	1	1	1	1	88.8278	77.0063	1	1	1
BMS1	1	1	46.2012	30.2004	1	45.958	1	35.988	33.4428	1	1
BNIP3	1	1	56.299	1	1	65.4684	1	1	1	1	1
BOD1L1	1	1	1	1	1	1	30.9886	1	21.9481	1	1
BOLA1	1	1	85.6485	1	1	1	1	1	1	1	1
BOLA3	1	59.4703	101.56	43.2511	1	91.2628	1	78.2134	55.55	1	70.6868
BORCS6	1	112.333	1	66.3663	1	1	83.3285	1	1	76.7914	1
BORCS7.ASMT	1	32.3731	37.8888	1	1	37.1876	35.4582	1	1	1	1
BPGM	1	130.169	1	115.623	1	1	90.184	1	103.568	1	1
BRAF	1	1	49.2721	1	1	1	38.1155	1	1	1	1
BRAP	1	1	72.5873	1	60.0079	1	1	1	1	1	31.0914
BRAT1	1	1	1	38.9734	1	40.4564	45.0113	1	1	1	1
BRCC3	1	68.9811	49.6076	37.7612	1	1	1	1	1	1	61.4443
BRD7	1	34.7845	43.3612	1	1	39.8893	74.2678	47.1716	1	1	1
BRE.AS1	29.0518	1	1	36.0337	38.541	1	1	1	101.184	1	35.1722
BROX	1	1	1	1	1	1	50.8832	1	1	1	1
BSCL2	1	1	1	1	1	1	1	1	1	1	40.44
BTBD1	58.4083	56.7193	1	47.6412	1	1	72.8724	50.8076	38.3221	67.0307	1
BTBD10	59.0866	58.0753	1	53.1454	1	1	70.1057	59.8178	1	1	44.261
BTG3	80.6674	1	1	186.351	131.735	1	94.1295	92.8556	370.864	115.303	187.661
BTLA	1	1	80.8411	68.094	1	73.248	1	1	84.9353	1	161.661
BUD13	1	1	1	65.5155	1	1	111.726	1	1	1	39.7137
BZW2	1	1	73.9647	50.1748	1	1	1	1	1	1	62.1507
C10orf128	61.949	1	1	1	1	1	73.7198	58.9364	1	1	1
C11orf21	92.9563	140.359	109.578	1	49.1062	67.1231	110.175	1	1	55.5591	1
C12orf10	1	1	1	81.3388	1	80.2927	1	1	71.1752	97.6626	48.2623
C14orf37	1	1	21.0662	1	1	19.3446	1	1	1	1	1
C15orf53	1	1	1	1	1	1	1	1	94.9127	101.135	82.2262
C15orf61	1	1	1	1	1	1	1	1	44.3856	1	1
C16orf58	1	1	74.7587	1	1	50.0174	1	1	1	1	1
C16orf62	1	1	1	1	1	1	65.7299	1	1	1	31.5496
C16orf87	1	1	1	89.2251	1	1	1	1	124.391	101.466	129.453
C17orf80	1	1	1	1	1	1	1	1	21.3487	34.177	1
C18orf21	79.1095	92.1325	1	1	1	80.8354	57.8767	1	1	1	75.1769
C19orf12	1	37.4757	1	25.5939	1	1	39.9129	1	1	1	1
C19orf48	1	1	93.2304	78.7326	1	1	1	1	1	1	68.6844
C1GALT1C1	1	100.572	1	80.9642	1	95.2869	84.8041	111.339	98.5668	80.1729	76.0836
C1orf112	1	1	22.6023	1	1	1	1	1	1	32.3725	1
C1orf122	1	1	1	1	1	1	28.8009	1	1	1	1
C1orf162	1	137.103	491.542	1	1	445.824	249.532	1	1	1	1
C1orf21	1	67.966	1	1	1	1	45.6735	1	1	1	1
C1orf228	1	1	116.696	1	1	116.432	1	1	1	1	1
C1orf52	61.4146	54.0811	45.9646	1	1	56.0083	1	1	1	1	1
C20orf196	1	1	1	1	1	1	1	1	1	1	53.9861
C22orf39	50.7083	1	37.4973	39.8831	65.9279	56.7562	1	46.9894	1	44.6116	1
C2CD5	1	1	1	41.5236	1	1	1	1	41.011	1	1
C3AR1	148.786	1	1	1	1	1	111.11	101.015	246.46	1	1
C3orf38	81.9857	1	1	78.9746	87.7574	1	1	80.9018	66.1498	1	76.9573
C4orf48	1	1	1	55.8735	31.2892	55.0229	1	1	104.248	41.7693	54.1833
C5orf22	1	1	1	40.5275	1	1	1	1	38.9261	1	1
C5orf24	1	1	1	1	1	1	1	1	1	1	42.3695
C6orf201	59.4757	47.7927	63.4596	40.6689	49.2924	1	1	1	44.7945	49.9794	1
C8orf44.SGK3	60.1081	1	1	1	1	43.0619	1	48.4027	1	49.0975	1
C8orf76	1	1	84.824	79.8412	1	1	1	1	1	1	78.5297
C9orf66	1	1	1	35.7966	1	1	1	34.0559	1	1	1
CA5B	1	1	1	1	1	39.7192	1	1	1	1	1
CA5BP1	69.5421	1	1	1	1	1	1	1	1	1	1
CA6	1	1	86.8152	1	1	1	1	1	1	1	1
CAAP1	1	1	1	1	1	1	1	1	1	1	40.2652
CADM1	1	1	1	1	1	1	1	1	85.292	1	1
CALU	1	1	1	49.2481	1	1	1	1	44.8483	1	34.4595
CAMK1	1	1	1	82.6654	1	1	1	1	62.976	1	102.811
CAPG	111.422	1	1	117.414	138.964	104.94	1	268.384	100.596	1	90.8673
CAPN12	57.7362	1	1	1	1	1	1	1	1	1	1
CAPN7	49.1274	33.6275	64.8636	1	1	38.7026	54.1173	46.8589	1	1	1
CAPNS1	1	50.5182	1	1	1	1	53.0799	38.6003	72.4102	1	45.023
CAPS	1	31.2635	44.5829	1	1	47.7996	1	1	1	61.5902	1
CARD17	1	1	1	1	1	1	1	74.7446	179.962	167.296	63.5313
CARD8.AS1	55.1486	70.8183	48.4522	1	1	1	73.8227	1	1	71.7065	1
CASP6	1	1	59.9892	1	1	125.338	81.2899	102.545	1	136.898	63.8351
CASP7	1	81.558	1	96.7343	91.781	1	73.1732	73.9271	93.2527	1	126.976
CASP8AP2	1	1	66.6453	1	1	74.3457	50.9951	40.1479	1	71.0991	1
CBR1	1	1	76.3379	1	1	71.5125	1	1	49.4145	47.2698	61.9194
CBR4	1	43.8734	1	1	1	1	40.2795	1	1	1	1
CBX1	1	1	55.3802	1	1	1	1	1	1	1	1
CCDC127	1	1	84.1834	1	1	1	1	1	1	1	1
CCDC137	1	1	1	52.4433	1	1	1	1	1	60.0503	1
CCDC14	1	1	1	27.1249	1	1	1	1	1	1	1
CCDC141	1	1	1	27.7464	1	1	1	1	36.189	61.2447	1
CCDC142	29.4298	1	48.8239	24.8987	1	1	1	1	27.5998	1	27.2301
CCDC159	1	1	1	1	1	1	53.8706	1	52.722	59.7696	40.4386
CCDC22	1	1	1	70.5334	1	1	64.8098	1	67.1878	72.6499	50.0832
CCDC25	1	1	43.3862	1	1	49.3963	1	1	1	57.737	1
CCDC28B	1	70.7441	1	1	1	1	1	1	1	1	1
CCDC43	1	1	1	61.6722	1	1	1	1	1	1	1
CCDC50	1	1	1	1	1	1	1	1	43.5961	1	64.0202
CCDC58	1	1	48.7947	1	1	1	1	1	1	1	1
CCDC65	1	110.108	1	1	1	55.7422	89.5112	1	1	1	1
CCDC73	1	1	1	14.8452	1	17.3992	1	17.0297	1	16.4338	1
CCDC93	1	31.4921	34.7179	1	1	35.5379	35.0077	1	1	1	35.0145
CCDC94	94.2384	68.7387	1	71.1328	1	95.855	87.8778	1	79.9009	134.429	1
CCL20	257.324	1	1	1	1	1	1	1	244.162	1	1
CCL3	1	1	1	2687.19	583.645	1	1	1	1	1	196.568
CCL3L1	1	1	1	65.126	48.999	1	1	1	1	1	1
CCL3L3	1	1	1	60.4783	50.0477	1	1	1	1	1	1
CCL4	1695.76	1627.65	1	5234.64	4681.11	1	1474.33	786.469	1	1	1263.3
CCL4L1	82.4048	120.027	1	580.108	401.716	1	54.3903	1	1	1	53.8866
CCL5	4226.57	7368.93	2113.05	7734.5	7730.64	298.583	4678.25	2592.85	105.536	1	1185.49
CCNA2	1	1	1	86.242	1	1	1	1	1	1	71.5746
CCNB2	1	1	1	1	1	1	1	1	1	1	58.6689
CCNG2	1	1	1	1	1	1	1	1	36.2799	1	1
CCR1	194.443	1	1	72.7366	1	1	1	1	121.853	1	1
CCR10	1	1	1	1	1	1	1	1	1	116.66	1
CCR2	114.039	1	1	1	1	1	1	141.14	1	1	1
CCR4	1	1	1	1	1	1	1	1	191.807	496.355	118.222
CCR5	132.762	1	1	95.5016	132.28	1	1	127.23	124.608	1	139.501
CCR6	193.472	1	1	1	1	64.445	1	164.554	86.6518	130.806	38.0623
CCR7	1	1	2437.16	1	1	1965.11	1	120.918	1	748.825	1
CCR8	1	1	1	1	1	1	1	1	943.455	130.784	1
CCRL2	1	1	1	98.7247	1	1	1	1	1	1	1
CD101	73.4394	53.838	1	103.573	135.268	1	1	1	1	1	1
CD151	41.969	1	1	28.0133	1	1	1	1	35.2936	1	39.6577
CD160	235.869	101.753	1	1	97.9161	1	1	1	1	1	1
CD177	1	1	1	1	1	1	1	1	113.551	1	1
CD200	1	1	1	111.552	1	1	1	1	1	1	249.208
CD200R1	1	1	1	129.92	84.4449	105.324	1	141.655	1	1	97.2652
CD226	1	127.844	1	71.6744	1	87.3342	146.245	128.971	1	1	157.968
CD244	198.805	285.17	1	224.539	225.003	1	129.705	1	1	1	1
CD248	1	1	117.687	1	1	1	1	1	1	1	1
CD300A	1	164.998	1	1	1	1	435.922	145.904	1	1	1
CD38	1	1	1	424.55	168.374	1	1	1	1	1	314.863
CD4	1	1	1	1	1	645.571	719.178	718.987	1004.85	630.588	813.438
CD40LG	492.624	1	1	1	1	497.599	660.348	1014.2	1	1	557.245
CD55	140.134	79.4878	280.831	1	61.1898	185.891	1	89.3373	1	123	1
CD59	1	1	1	43.3239	1	1	37.5293	1	83.0665	90.5994	55.5887
CD69	2494.24	308.866	260.676	984.935	1840.3	286.705	351.917	1621.79	248.368	111.566	653.061
CD70	1	1	1	94.476	1	1	1	1	125.738	1	104.466
CD79A	1	1	97.704	1	1	1	1	1	1	1	1
CD80	1	1	1	1	1	1	1	1	95.5078	1	1
CD81	1	86.9705	1	1	120.793	1	1	1	1	1	1
CD83	1	1	1	1	1	1	1	1	222.329	1	1
CD8A	1452.61	1754.32	997.138	2463.86	1857.33	1	1	1	1	1	1
CD8B	232.317	912.498	1152.97	914.463	769.052	1	1	1	1	1	1
CDC20	1	1	1	1	1	1	1	1	1	1	69.5995
CDC37L1	1	96.4542	96.6759	70.5378	1	102.839	92.3631	1	70.8865	1	76.9374
CDCA4	1	84.4284	1	77.2438	1	1	67.3216	82.6628	1	1	59.1929
CDCA7	1	1	1	81.8572	1	1	1	1	1	1	112.216
CDIP1	1	1	1	1	1	1	1	1	94.5169	1	35.758
CDK1	1	1	1	1	1	1	1	1	1	1	62.8566
CDK12	24.6846	1	36.3233	27.0262	25.8329	26.5755	1	34.7	23.4796	1	1
CDK13	1	1	1	1	1	1	1	1	1	27.401	1
CDK16	1	1	1	34.0599	1	1	1	1	1	1	1
CDK2	1	1	1	60.9831	1	1	1	1	1	1	1
CDK6	29.9408	1	1	33.7629	26.7271	1	1	40.1351	35.5144	1	36.5241
CDK7	1	1	1	1	1	1	69.0229	1	76.6382	1	1
CDK9	66.8403	60.7045	55.7801	68.9535	1	1	102.815	1	1	1	1
CDKN1A	1	1	1	1	1	1	1	1	101.716	1	1
CDKN2A	1	1	1	51.8773	1	1	1	1	59.6833	1	56.2011
CDKN2AIP	98.7647	86.6978	112.36	71.2866	106.924	118.306	1	1	1	136.343	74.9748
CDKN2D	65.0937	103.812	92.1166	1	1	80.1993	112.44	1	1	100.722	1
CDKN3	1	1	1	1	1	1	1	1	1	1	128.555
CDR2	1	1	1	1	1	1	1	1	1	1	53.1113
CEACAM1	1	1	1	1	1	1	1	1	68.3295	1	1
CEBPD	114.462	1	1	1	1	1	1	1	1	1	1
CECR5	1	1	1	1	1	68.8887	1	1	1	1	1
CENPF	1	1	1	1	1	1	1	1	1	1	40.5942
CENPK	1	69.2989	116.047	68.1909	1	123.418	124.871	1	1	114.366	106.876
CENPM	1	1	1	52.15	1	1	1	1	1	1	94.3386
CENPN	1	1	1	23.7891	1	1	1	1	20.8996	1	29.8566
CENPO	1	1	1	1	1	1	1	1	31.2842	1	1
CENPU	1	1	1	1	1	1	1	1	1	1	59.2688
CEP120	1	1	1	1	1	1	1	1	1	1	47.1409
CEP135	1	1	1	1	1	33.4767	1	1	28.3738	1	1
CEP250	1	29.3658	1	25.8522	28.9925	1	36.3003	1	1	30.3636	1
CEP68	1	1	53.3924	1	1	48.7799	1	1	1	1	1
CEP78	1	95.748	1	1	1	1	137.04	1	1	61.2851	1
CEP95	1	50.5115	62.9243	26.6728	54.7429	57.9577	31.6243	1	1	1	1
CES2	1	1	45.8377	1	1	1	1	1	1	1	1
CES4A	1	1	1	1	1	1	1	1	57.7657	1	1
CFAP36	1	1	102.948	1	1	162.165	1	80.3463	1	74.4166	1
CFAP73	1	1	1	33.2951	1	1	1	1	1	1	1
CFAP97	36.9676	29.7245	25.685	1	1	40.2031	39.2528	44.6504	28.6642	1	1
CGRRF1	1	90.4234	1	1	1	1	1	1	80.6258	1	1
CHCHD10	1	1	35.8684	1	1	1	1	1	1	1	1
CHD1L	55.3378	54.8918	1	55.9447	1	1	1	1	1	1	61.5892
CHERP	1	1	40.3469	1	1	1	1	1	1	1	30.6437
CHI3L2	1	108.324	1	1	1	1	1	1	1	1	1
CHID1	1	1	1	43.7231	1	1	1	1	42.1726	1	42.5997
CHMP6	1	1	1	76.5467	1	1	82.7423	1	70.5095	75.8298	97.4006
CHN1	1	1	1	1	1	1	1	1	1	1	112.066
CHPF2	40.0147	1	1	1	1	1	1	1	1	1	1
CHST11	1	1	1	26.2158	1	1	1	1	32.8384	1	1
CHST12	230.204	340.447	1	503.342	288.327	1	278.837	130.182	66.1421	70.3495	114.159
CHUK	1	1	1	1	1	1	53.9821	1	1	1	1
CIAPIN1	75.7466	102.059	135.813	71.9217	1	70.0157	1	1	53.9056	1	76.9576
CIDEB	1	1	1	1	1	1	52.6391	63.4558	1	1	1
CINP	1	1	1	1	1	1	1	1	53.8198	1	1
CISD1	1	1	1	59.6784	1	1	1	1	42.3136	1	1
CISD2	1	1	1	27.333	1	1	1	1	35.2359	1	35.0295
CISD3	51.2666	46.1276	1	1	1	1	1	1	38.8504	1	1
CITED2	45.0748	1	34.125	1	1	1	1	1	1	1	1
CKAP2	1	1	1	59.3557	1	1	1	1	70.8854	64.1164	88.2307
CKAP5	1	1	1	32.7414	1	1	46.4084	1	1	1	32.4773
CKS1B	1	1	1	1	1	1	1	1	1	1	30.1692
CKS2	1	1	1	271.986	137.696	1	1	1	139.84	72.5143	226.2
CLASP1	1	1	1	19.5751	1	1	1	25.6991	1	1	1
CLCC1	1	1	1	1	1	1	1	1	37.224	44.848	1
CLEC16A	1	1	1	1	1	1	35.8683	1	27.1401	1	1
CLEC7A	1	1	1	1	1	1	1	1	99.8058	1	1
CLECL1	1	1	1	117.718	58.8885	1	1	1	1	1	1
CLIC3	105.277	279.226	1	199.421	94.9282	1	97.6127	1	1	1	1
CLIP4	77.2479	44.9585	57.6872	41.2705	59.8402	1	71.8178	56.4094	1	1	1
CLN5	1	1	1	1	1	62.0859	1	1	73.9484	90.5424	1
CLNK	1	1	1	72.3859	1	1	1	1	84.3342	1	1
CLSTN3	1	1	1	45.753	1	1	24.3058	33.1866	28.1788	1	51.5946
CLUAP1	1	1	31.1175	1	1	28.6405	1	1	1	1	1
CMAHP	1	1	1	1	1	1	1	1	36.0102	82.533	57.4258
CMC4	1	1	1	52.1271	1	1	1	1	1	1	1
CMTR2	1	1	45.3182	1	1	1	50.3619	1	1	1	1
CNEP1R1	1	1	1	68.0085	1	1	92.0398	1	72.7602	69.8215	1
CNOT11	1	1	1	1	1	59.7999	53.7728	1	1	1	1
CNPY4	1	1	90.9062	1	1	1	1	1	1	1	1
COG8	1	1	53.2015	40.1563	1	1	55.045	1	37.9798	1	32.2728
COL4A3BP	1	36.4254	1	31.2711	1	41.738	1	1	37.5337	43.2891	1
COL9A2	1	1	1	1	1	1	1	1	58.3652	1	1
COLGALT1	54.8741	52.153	45.7769	31.2414	1	48.1657	1	1	1	48.7175	1
COLQ	354.922	1	1	1	1	1	1	1	1	1	1
COMMD9	49.4279	54.2203	1	1	1	59.2492	1	1	1	1	39.6744
COMTD1	1	70.538	1	1	1	1	1	73.9397	1	1	61.9264
COPS2	1	1	86.2962	1	1	1	1	1	1	1	50.4047
COPS7B	1	44.6954	56.9706	36.6632	44.8045	49.4302	1	1	1	1	32.2242
COQ5	1	1	1	125.048	1	1	1	1	92.7449	136.943	117.243
COQ8A	1	1	39.4521	1	1	1	1	1	37.8385	43.3553	1
COQ9	1	1	60.2393	1	1	1	1	1	1	1	1
CORO1B	1	1	27.9967	33.4191	1	88.3893	1	65.209	237.538	150.228	201.38
CORO1C	1	1	1	49.9794	1	1	1	1	1	1	50.7723
CORO2A	1	1	1	1	1	1	1	1	1	38.1922	1
COX10	1	1	39.476	1	1	1	1	1	42.1321	75.2912	1
COX10.AS1	1	1	49.9276	1	1	1	1	1	1	1	1
COX15	1	1	1	20.1075	1	25.8925	1	1	1	25.8574	35.3524
COX19	1	1	1	1	1	1	1	1	1	52.2262	1
CPNE7	1	1	1	1	1	1	1	1	1	1	69.3416
CPSF1	1	1	1	35.8851	1	1	1	1	31.2602	39.7176	35.6677
CPSF3	1	1	1	70.8572	1	1	1	1	65.8077	1	70.8659
CPT1A	1	38.7522	1	1	1	1	1	1	1	1	32.6213
CRACR2A	39.4721	1	1	1	1	1	1	1	1	1	1
CRADD	1	1	1	1	1	1	1	1	85.4389	1	1
CREB3L2	43.094	1	1	39.6521	1	1	1	35.0084	94.4052	1	19.4369
CREBBP	25.7708	1	24.1969	1	1	26.4465	21.6176	1	1	1	1
CREBL2	1	1	1	1	1	64.5108	1	1	53.334	70.7086	40.9183
CREBRF	1	1	27.9703	1	1	32.4422	1	1	1	1	1
CRELD1	85.1937	1	1	1	1	1	1	1	1	1	1
CRELD2	1	1	1	53.2656	1	1	1	1	1	1	38.0061
CREM	84.4458	1	1	201.22	156.294	1	1	148.113	256.611	1	261.295
CRIP2	1	1	1	1	1	67.7771	1	1	1	89.2933	1
CRNKL1	1	1	1	1	1	1	60.9385	1	37.5115	1	1
CRTAM	1	132.316	106.768	136.743	210.594	1	1	1	1	1	1
CRTAP	1	1	1	1	1	47.5312	1	44.108	41.1775	61.6208	1
CRTC3	1	1	28.984	1	1	35.0151	1	1	1	37.2145	1
CRY1	98.6235	1	1	65.0628	82.3404	1	59.4283	78.4871	73.1374	66.7782	1
CRYBB2P1	1	45.948	57.5882	42.0454	1	69.5065	1	1	1	1	43.042
CRYL1	1	1	1	1	1	1	1	1	1	90.0463	1
CSAD	1	1	1	1	1	1	1	1	35.0301	1	1
CSF1	1	1	1	199.543	1	1	1	1	118.89	1	59.5975
CSGALNACT1	1	1	1	1	1	69.8929	1	1	1	126.479	1
CSNK1E	1	1	1	1	1	1	1	1	24.0935	1	1
CSNK1G1	1	1	1	27.6192	1	1	1	1	1	1	33.7033
CSNK1G3	1	1	1	40.2006	49.8688	1	1	48.1847	37.1455	1	31.8832
CSNK2A2	1	1	1	1	1	1	1	1	1	46.2858	1
CSNK2A3	1	1	1	38.3969	1	1	1	1	49.2037	1	35.6364
CSRNP1	1	1	1	53.2354	1	1	1	1	76.5573	1	1
CSTF2	1	1	1	62.5368	1	1	1	1	81.2377	1	60.2604
CTDSP2	56.1538	1	84.7148	1	1	80.2961	44.7259	67.6839	1	46.1299	46.2653
CTDSPL2	1	1	38.0227	45.9168	1	1	29.0064	52.7997	34.8545	56.3795	29.8604
CTLA4	1	1	1	399.602	1	1	1	1	1304.09	241.738	650.95
CTNNA1	1	1	1	66.5777	1	1	1	1	97.9625	1	1
CTSH	150.318	1	1	1	1	1	1	105.747	1	1	102.514
CTSL	1	1	1	1	1	1	1	1	1	1	144.003
CTSO	115.793	1	61.7867	1	1	1	1	1	1	1	1
CTSW	1618.47	2181.27	887.615	1999.35	1684.82	154.601	1126.78	338.957	1	1	1
CTTNBP2NL	1	1	1	1	1	1	1	1	32.034	1	1
CUL4B	1	1	1	1	1	44.9339	1	1	1	48.9467	1
CUL9	1	1	23.7357	1	1	26.82	1	1	35.6034	1	1
CX3CR1	1	929.094	1	1	1	1	1203.83	1	1	1	1
CXCL13	1	1	1	728.301	1	1	1	1	1	1	5971.96
CXCR6	1886.47	131.4	1	2268.03	1606.03	1	142.847	1467.26	1848.89	198.352	1538.36
CXorf40B	1	50.0751	1	43.8585	1	1	43.8205	1	41.2595	1	40.8083
CYB561	1	61.5382	1	1	1	51.5097	57.6698	60.0234	1	1	1
CYB561A3	1	65.8351	1	51.6973	1	1	50.2069	1	42.7821	57.4091	50.923
CYB5A	129.514	1	123.587	1	1	1	1	1	83.5609	1	73.42
CYSLTR1	1	1	1	1	1	108.317	1	1	1	1	173.721
CYTH2	1	1	1	1	1	1	1	1	32.5733	1	1
D2HGDH	1	1	1	29.4275	1	1	1	1	1	1	1
DAGLB	1	26.7109	1	24.1407	1	1	1	1	19.5509	1	1
DAPK2	1	1	1	32.5773	1	1	1	1	1	1	1
DAPP1	1	1	1	1	1	56.7589	1	1	86.6442	73.7845	75.927
DAZAP1	1	1	1	27.3322	1	1	1	1	1	1	22.3187
DBF4	1	1	1	31.803	42.2019	1	1	34.5056	32.7895	48.4526	37.7504
DCAF12	67.7088	1	1	92.0717	1	1	1	1	55.62	1	46.9931
DCAF16	1	1	50.1155	37.3057	1	1	1	38.3893	1	1	43.2375
DCAF6	45.3341	1	1	33.3696	1	1	1	1	43.9253	1	35.2069
DCP1B	1	1	1	1	1	1	1	1	70.3845	88.0265	1
DCTN5	1	38.5649	1	35.0564	1	1	1	1	38.9231	1	1
DCUN1D1	1	1	1	41.1474	52.1578	1	44.2689	63.9068	47.3843	66.4116	63.546
DDA1	35.9912	1	33.3801	36.41	1	1	41.9914	1	35.3967	1	38.4963
DDI2	1	1	1	43.3271	1	1	1	1	1	1	1
DDX28	1	1	76.4918	1	1	1	1	1	1	1	1
DDX42	1	1	48.5243	1	1	1	1	1	1	1	1
DDX49	1	1	1	1	1	1	1	1	47.4314	1	57.8031
DDX52	1	1	1	30.8109	1	1	42.2686	1	1	1	1
DDX54	1	1	49.49	47.6878	1	1	1	41.4521	41.0188	1	39.8194
DDX59	1	1	1	59.2743	66.5338	1	66.8623	1	1	1	1
DDX60L	1	1	24.4293	28.8636	1	29.8659	1	1	31.7754	30.754	1
DENND1B	1	1	1	21.6828	1	1	1	1	21.2905	1	1
DENND4A	47.547	41.0641	42.5398	1	49.3648	1	46.1512	48.6353	1	32.6307	1
DENND4C	32.029	29.1992	27.2514	1	1	1	31.3499	29.0806	1	30.5834	1
DERA	1	1	1	47.9137	1	1	1	1	1	1	72.7775
DESI1	1	1	1	45.83	1	1	49.1111	1	51.5474	1	40.2817
DFFA	1	1	71.5918	58.9811	1	1	1	1	1	1	1
DGAT1	1	1	1	1	1	27.2593	1	1	1	25.5258	1
DGCR2	1	49.4928	1	50.1684	43.8236	51.0915	34.2488	1	62.3944	77.9699	1
DGKD	1	37.1218	27.4599	1	1	1	1	1	1	36.0626	1
DGKH	1	1	1	30.0608	1	1	1	1	1	1	1
DHRS3	106.824	1	108.541	1	93.2805	99.7306	60.2115	128.721	1	1	1
DHRS4.AS1	1	38.9714	1	1	1	1	1	1	1	1	1
DICER1	1	1	1	1	1	1	23.1906	1	1	1	1
DIS3L	1	63.6843	52.7284	49.1574	81.8573	1	1	1	1	1	31.1164
DIS3L2	31.3149	36.467	43.4174	1	1	35.0563	1	1	27.9973	1	33.0899
DKK3	111.576	1	1	1	1	1	1	1	1	1	1
DLEU2	1	1	1	29.4635	1	1	1	24.0934	1	1	29.1542
DLGAP1.AS1	1	1	1	77.0411	67.0443	1	104.065	87.3926	143.866	79.7953	65.0462
DNAAF2	57.4167	1	1	1	59.3156	1	1	1	44.5356	1	1
DNAJB12	1	1	1	40.3319	1	1	1	1	46.8397	1	39.4177
DNAJC11	1	1	1	1	1	1	46.3287	1	1	60.1945	1
DNAJC16	1	1	25.8744	1	1	1	1	1	1	1	1
DNAJC25.GNG10	1	1	35.0027	37.0048	1	1	40.4224	34.7862	37.594	47.6576	1
DNASE1L1	1	1	1	1	1	24.816	1	1	1	1	1
DNMT3A	1	1	43.4219	1	1	1	1	1	1	1	1
DNPH1	1	1	83.5483	91.714	55.0891	79.0806	1	69.0656	416.789	86.9856	186.763
DNTTIP1	1	1	1	76.1959	1	1	1	1	1	1	1
DOK1	1	1	1	1	1	1	1	1	56.0485	1	1
DPAGT1	1	1	75.7525	69.7524	1	1	1	1	52.038	1	59.0272
DPEP2	1	1	74.7621	1	1	92.8939	1	1	1	111.889	1
DPH2	1	1	147.772	1	1	1	1	1	1	1	1
DPH3	1	1	1	1	1	1	1	1	36.814	1	1
DPH5	1	1	85.1739	1	1	72.658	1	1	1	1	1
DPM3	1	1	68.2166	1	42.6	1	1	1	55.9736	1	1
DPP3	1	58.0772	1	86.8474	1	1	1	70.128	75.7319	62.5206	100.087
DPP4	359.735	1	80.7881	1	1	106.866	1	238.932	1	1	1
DPYD.AS1	47.0479	51.0735	80.019	1	1	67.2692	70.3771	75.8054	1	63.0972	1
DPYSL2	1	1	1	1	1	1	1	1	86.5966	1	1
DSN1	1	1	1	55.0771	1	1	1	1	1	1	1
DTHD1	1	68.2681	1	82.4541	101.216	1	1	1	1	1	1
DTNB	1	1	1	1	1	1	1	1	1	46.8677	1
DTNBP1	1	1	1	1	1	1	62.3095	1	1	1	1
DTYMK	1	54.3243	1	64.0398	1	1	1	1	1	1	62.2724
DUS2	1	1	59.159	1	1	1	1	1	1	1	1
DUS3L	1	1	66.1101	1	1	1	1	1	1	1	1
DUSP10	1	1	1	78.7208	67.499	1	1	1	89.2582	76.2853	1
DUSP16	1	1	1	51.4828	1	1	1	1	106.059	43.2109	50.7399
DUSP18	1	1	1	1	1	1	1	1	1	106.089	1
DUSP2	679.665	263.297	181.46	1334.31	1464.94	1	194.873	475.637	520.68	1	546.568
DUSP22	1	83.8929	1	43.7162	61.5933	1	1	57.013	72.6274	85.3757	1
DUSP4	1	1	1	122.496	1	1	1	1	238.994	1	189.746
DUSP6	1	1	1	1	75.2263	1	1	113.174	1	1	64.2928
DVL2	1	1	1	42.6378	1	1	1	1	1	1	1
DYNC1I2	1	1	1	1	1	1	1	1	41.038	1	1
DYRK2	41.0202	42.8306	53.8902	1	1	54.7102	40.1702	1	1	45.5059	1
DZIP3	1	1	1	38.4679	1	1	1	1	1	1	1
E2F4	1	87.6356	1	86.3022	1	1	110.45	84.0848	1	1	60.1372
E4F1	75.7944	1	60.8802	63.8947	1	1	1	1	1	1	1
EAF1	93.1229	64.6493	56.9179	38.0342	54.9612	1	65.6097	81.6255	1	1	1
EBAG9	63.2585	1	49.5768	1	57.7707	73.3607	1	1	1	1	1
EBI3	1	1	1	1	1	1	1	1	102.315	1	1
ECE1	1	1	1	1	1	53.0856	1	41.2655	33.9714	61.3327	35.2675
EDC3	1	1	1	36.0346	1	1	1	1	1	1	1
EDC4	1	1	52.2145	1	1	1	1	1	1	55.3544	1
EDEM3	1	1	32.5899	1	1	46.4859	1	1	1	39.2144	24.7734
EDRF1	1	46.4681	28.3215	34.0847	34.6622	33.7972	1	1	1	35.4198	36.1289
EEF2KMT	72.4682	1	1	27.042	1	1	1	1	40.1204	1	1
EFHD2	86.2659	283.948	1	54.4286	59.7343	1	259.8	79.5523	99.0598	1	43.7613
EGR2	1	1	1	102.672	1	1	1	1	1	1	1
EHD4	1	1	1	1	1	1	1	1	1	1	46.4733
EIF1AD	1	1	1	1	1	1	1	1	1	62.7431	1
EIF2B2	1	95.3337	1	87.4907	85.5073	1	141.833	87.8409	84.3096	1	97.3754
EIF2B3	1	76.0504	77.0707	1	1	73.7321	1	1	1	1	1
EIF2B5	1	59.0096	49.7574	40.0656	1	1	69.1442	1	1	1	1
EIF2D	1	1	71.7557	1	1	1	1	1	1	1	1
EIF3B	1	1	1	1	1	1	1	1	1	1	34.2983
EIF3J.AS1	1	1	66.1991	1	1	1	1	1	1	1	1
EIF4E3	1	32.057	47.7971	1	1	1	38.9534	35.6803	35.3673	27.1231	1
EIF4EBP1	1	1	1	67.7607	1	1	1	1	1	1	56.5352
EIF4G3	1	25.6141	1	1	1	1	33.3575	1	32.7408	1	1
ELF2	39.0856	41.536	1	1	33.3191	38.5942	27.666	1	1	1	1
ELF4	1	41.4885	1	34.6751	1	1	1	1	1	1	1
ELK3	98.5546	1	1	1	1	74.0289	1	68.9266	45.7181	170.156	45.8218
ELL	51.434	1	1	34.1898	1	1	1	42.1339	1	1	31.3517
ELMOD2	1	1	1	1	1	1	39.6469	1	1	1	1
ELMOD3	58.0702	1	1	1	51.7904	58.1968	50.2013	51.2364	1	72.3312	1
ELP4	1	1	49.9453	1	1	1	1	1	1	1	1
ELP6	1	93.2432	1	61.8971	82.8116	1	72.8867	1	76.7987	69.8604	105.441
EMBP1	1	1	1	1	1	1	1	35.8492	1	1	1
EMC8	1	1	1	50.0693	1	1	1	1	1	1	43.7181
EMC9	1	1	1	75.8126	1	104.047	1	88.2398	113.084	96.5322	89.2166
EML3	1	1	1	1	1	1	1	1	1	1	30.8174
EMSY	1	1	1	1	29.3949	1	1	1	1	1	1
ENO2	94.3355	84.7526	88.3767	1	68.1447	102.099	1	65.5137	1	80.3581	1
ENOSF1	1	1	41.7739	67.4424	1	33.8002	1	1	1	1	65.5661
ENPP4	1	81.5237	1	1	1	1	71.6137	1	1	1	1
ENTPD1	1	1	1	115.382	1	1	1	1	153.378	44.0033	83.7986
ENTPD1.AS1	1	1	1	34.5654	1	1	1	1	43.5289	1	27.7895
ENTPD6	1	1	49.0002	1	1	1	1	1	40.1635	1	1
EOMES	169.786	185.409	1	128.912	214.045	1	119.426	76.195	1	1	1
EPB41L4A.AS1	1	1	48.1689	1	1	59.5325	1	1	1	1	1
EPHX2	1	1	139.149	1	1	126.723	1	1	172.268	1	1
EPM2AIP1	1	1	39.9012	1	40.2723	43.1258	32.0375	42.4769	33.3789	49.7534	1
EPS15L1	1	1	1	22.3524	1	1	31.5127	1	1	1	1
ERAL1	1	1	1	49.3914	1	1	1	1	1	1	68.149
ERCC6L2	1	33.1557	52.7784	1	43.4257	53.0771	1	38.7461	1	44.2541	1
ERI1	1	1	1	37.4456	1	1	65.7823	1	116.729	1	39.6172
ERI3	1	1	1	51.7151	1	1	53.2335	1	1	1	1
ERN1	146.436	34.7913	1	1	44.9822	41.467	40.7559	93.2696	1	1	1
ERP27	1	1	1	1	1	1	1	1	1	116.033	1
ESF1	1	1	56.0434	1	1	1	1	1	1	1	1
ESYT2	1	1	30.9495	1	1	57.7535	35.2898	35.8079	27.0991	46.9555	25.4412
ETFDH	1	1	1	1	1	1	55.506	1	1	1	1
ETFRF1	140.574	1	217.963	1	1	149.631	1	1	1	1	1
ETV1	1	1	1	32.8959	1	1	1	1	1	1	1
ETV6	1	1	1	1	1	1	1	1	1	1	32.2932
ETV7	1	1	1	109.87	1	1	1	1	197.359	1	236.45
EXOC5	1	28.1623	1	32.7106	30.1938	1	1	35.8418	28.9468	1	47.0145
EXOG	1	1	1	1	1	1	55.6579	1	1	1	1
EXOSC4	1	1	1	66.9482	1	1	1	1	1	1	1
EXOSC5	1	1	136.164	47.9247	1	92.9536	1	1	1	105.514	1
EXOSC7	70.0387	1	1	51.6174	70.4758	67.7798	1	62.7892	68.9597	69.6532	1
EXT2	1	1	1	1	1	1	80.2493	1	1	1	1
EYA3	1	28.9035	1	41.2828	1	1	1	1	38.4972	1	42.4078
EZH2	1	1	1	72.2991	44.6612	1	1	1	46.0189	79.5433	85.7572
F11R	1	1	50.4262	1	1	37.9809	1	1	28.8064	1	1
F2R	178.479	257.395	1	244.6	320.218	1	208.759	179.184	1	1	344.77
F5	1	1	1	1	1	1	1	1	86.0878	74.4225	1
FAAH2	1	1	1	1	1	100.124	1	1	1	81.8221	82.7614
FAAP20	1	1	1	21.6734	1	1	1	1	1	1	1
FABP5	1	1	1	43.6463	1	1	1	1	1	1	30.2178
FAF1	1	1	1	39.6381	1	1	1	1	1	1	1
FAF2	1	1	1	43.7579	1	1	1	1	41.8178	49.8025	41.7424
FAHD2A	1	1	85.4497	1	1	1	1	1	1	1	1
FAM105A	1	1	1	35.6617	47.8034	1	1	1	1	34.782	1
FAM110A	65.9022	65.4162	1	76.8276	72.8746	59.2961	1	1	133.648	171.823	84.9529
FAM117A	55.3544	51.5165	45.1912	1	1	1	1	44.6167	1	69.4957	1
FAM117B	1	1	69.5312	1	1	40.1713	1	1	1	1	1
FAM118B	51.7111	42.7131	1	47.348	1	1	46.0974	1	35.7769	1	1
FAM120A	1	1	1	30.6332	1	1	31.897	29.5703	32.9456	34.8516	1
FAM120AOS	1	1	1	38.1587	1	1	1	52.1939	51.1824	40.0867	1
FAM126B	31.514	1	1	28.0315	1	1	1	1	1	1	1
FAM127B	1	1	57.3805	1	1	1	45.2284	1	55.477	1	1
FAM134B	1	1	50.8679	1	1	1	1	1	1	1	1
FAM160B1	1	41.2417	1	41.6847	42.5507	1	1	1	30.2957	55.629	47.0305
FAM173A	1	1	90.3419	73.6046	62.5531	1	1	1	73.8706	57.1598	1
FAM177A1	46.7603	1	1	45.4544	56.5567	1	1	55.6397	52.932	48.4684	49.7537
FAM179A	1	1	1	26.8736	1	1	1	1	1	1	1
FAM188A	1	1	1	1	1	1	1	1	1	53.5592	1
FAM214A	1	42.0735	1	37.5781	1	1	1	49.8006	48.1498	56.7754	1
FAM217B	1	36.6972	49.3353	1	1	35.7572	1	43.1708	40.9971	60.7959	1
FAM219B	1	84.2004	64.5599	49.4618	1	58.625	54.2418	1	48.378	87.9702	1
FAM222B	1	1	1	1	1	1	1	1	35.8055	1	1
FAM3A	1	1	69.3443	34.31	1	1	1	1	1	1	1
FAM3C	1	1	1	64.5905	1	1	1	1	1	1	1
FAM46C	1	1	1	68.8877	111.51	1	34.3029	101.596	86.1775	45.1231	120.645
FAM49A	1	1	1	49.9034	1	1	1	1	1	1	1
FAM63B	53.1062	42.3307	1	1	1	1	45.9168	46.2547	49.3411	1	1
FAM69A	1	1	1	1	1	51.7119	1	53.0615	62.1203	67.1081	39.1577
FAM76A	1	51.0269	1	1	1	44.9783	36.0631	37.4823	1	1	1
FAM78A	1	1	35.9055	1	1	30.515	34.1842	1	1	30.6496	1
FAM91A1	1	1	1	1	1	1	43.7129	1	1	1	1
FAM98C	1	1	1	58.6195	1	1	1	1	52.3975	1	1
FANCD2	1	1	1	1	1	1	1	1	1	1	26.7612
FANCF	1	60.1769	94.9871	1	1	56.5295	1	1	1	1	1
FANCG	1	1	1	54.3318	1	1	1	1	1	1	1
FANCI	1	1	1	43.891	1	1	1	1	28.0331	1	47.6186
FANCL	1	46.7041	1	132.157	85.5234	1	87.7153	1	163.186	67.5361	72.0252
FANK1	1	1	1	1	1	1	1	1	27.6874	33.8481	1
FAR1	1	43.4461	1	26.4194	48.7003	1	48.7159	1	1	1	32.5039
FARS2	1	1	100.83	70.7806	1	1	1	73.4235	82.053	1	78.6911
FASLG	311.665	333.045	1	590.388	451.653	1	297.571	194.672	1	1	1
FASTKD5	1	1	1	1	1	1	1	1	1	75.8212	1
FBLN5	1	1	1	1	1	46.2129	1	1	1	1	1
FBLN7	1	1	1	1	1	60.2006	1	56.5418	107.346	1	77.2767
FBRS	1	1	1	1	1	1	1	1	29.938	1	1
FBXL12	1	1	111.96	1	1	1	1	1	1	1	1
FBXL3	1	1	1	1	1	83.5766	57.0146	55.1777	1	88.5244	1
FBXL6	1	1	1	1	1	1	33.1294	1	1	1	1
FBXL8	1	1	1	1	1	51.2958	1	1	1	1	1
FBXO11	1	1	1	1	37.8023	1	1	1	1	1	1
FBXO18	1	1	1	1	1	1	1	1	43.3615	68.4244	1
FBXO22.AS1	1	1	1	1	1	1	1	1	1	1	149.312
FBXO28	1	1	46.5134	1	1	1	1	1	1	1	1
FBXO3	37.6009	1	41.8389	1	1	1	36.8431	1	1	40.1758	1
FBXO32	1	27.654	47.9874	1	1	32.6995	40.7087	1	1	33.496	1
FBXO34	69.1749	1	70.4609	1	70.3241	68.4069	1	72.3031	1	1	65.0091
FBXO4	1	1	1	1	1	1	1	1	1	1	56.3022
FBXO42	1	1	1	36.5715	1	1	1	1	42.2395	1	25.2858
FBXO44	72.8808	51.4868	53.7513	78.3695	71.8743	63.3127	48.8393	55.9179	1	1	1
FBXO6	105.913	175.369	1	161.119	110.756	1	83.8275	75.7354	1	1	133.011
FBXO8	71.1578	1	78.3675	63.3616	1	1	1	60.9604	46.3686	1	1
FBXO9	1	46.3848	30.6165	1	1	40.9423	34.21	1	29.8435	44.6652	1
FBXW11	1	43.7521	40.9896	42.9331	1	1	48.7386	1	49.8405	51.3441	1
FBXW4	1	1	50.5717	1	72.4035	1	1	1	1	1	1
FBXW7	1	1	1	25.9732	1	1	1	1	1	44.0817	1
FCGR3A	1	1178.74	1	248.586	125.486	1	202.242	1	1	1	1
FCGR3B	1	48.1323	1	1	1	1	1	1	1	1	1
FCGRT	1	1	58.8508	1	1	1	1	1	1	1	1
FCHO1	1	1	1	1	1	61.3116	1	1	1	1	31.5771
FCHSD2	1	1	1	1	1	1	1	1	1	43.8646	1
FCRL3	1	149.221	1	75.1066	95.8758	1	1	1	81.9543	156.224	1
FCRL6	1	978.629	1	128.741	527.981	1	620.459	139.381	1	1	1
FDXR	1	1	1	1	1	1	1	1	1	1	48.7678
FEN1	1	1	1	115.67	1	1	1	1	1	1	140.348
FEZ1	74.7529	1	1	1	1	1	1	1	1	1	1
FGFBP2	1	2150.11	1	1	1	1	2136.47	1	1	1	1
FGFR1OP	1	1	1	51.2339	1	1	1	1	1	1	1
FGL2	1	1	1	1	1	1	89.9444	1	1	1	1
FGR	1	468.41	1	1	88.5662	1	241.673	1	1	1	1
FH	1	1	1	83.2925	1	1	1	1	77.4531	1	120.661
FHIT	1	1	1	1	1	132.791	1	1	1	1	1
FHL3	1	1	1	1	1	1	1	1	76.3066	1	1
FIG4	1	1	1	58.7741	1	1	1	1	1	1	1
FKBP4	1	1	82.0081	1	1	1	1	1	1	1	1
FLOT1	1	38.1552	36.6043	1	1	26.2182	32.3222	1	1	1	1
FLYWCH2	1	1	64.9035	1	1	1	1	1	1	1	1
FMC1	1	1	1	1	1	1	1	1	37.4441	1	1
FMNL3	1	1	1	1	1	1	1	1	35.7416	1	25.77
FN3KRP	1	1	1	75.2859	1	1	1	1	79.2421	1	106.47
FNDC3B	1	1	1	1	1	1	34.8593	1	35.8235	1	1
FNIP1	1	1	33.7854	1	1	1	1	1	1	1	1
FOS	1611.15	1	1	552.24	678.704	1	280.427	1419.78	613.368	1	339.659
FOSB	104.326	1	1	74.6597	99.8628	1	38.5008	116.704	54.2186	1	33.828
FOSL2	1	1	1	26.0055	1	1	1	1	51.1992	1	1
FOXN2	1	42.6239	32.1027	51.0985	1	47.6901	1	1	27.6327	64.2914	38.1398
FOXO1	1	1	1	1	1	43.7101	1	57.6297	82.6623	48.0225	52.1205
FOXP3	1	1	1	1	1	1	1	1	696.507	272.324	1
FRG1BP	1	1	1	30.282	34.9631	31.4689	43.8707	1	1	1	1
FRMD4B	1	1	1	1	1	1	1	53.1572	62.2695	1	33.7699
FTO	1	1	66.115	1	1	48.8285	1	51.8548	52.3676	53.1793	1
FTX	1	1	60.9987	1	1	1	1	1	1	1	1
FUCA2	1	1	1	1	1	1	1	1	55.0107	1	1
FUOM	1	1	1	1	1	1	1	1	60.526	1	1
FUT11	1	75.0236	1	1	1	1	80.1728	1	1	1	1
FUT7	1	1	1	1	1	1	1	1	1	71.4288	1
FUT8	1	1	1	93.1237	1	1	1	1	34.7364	1	79.5733
FXR1	1	1	32.7456	1	1	34.0212	1	1	1	1	1
FYCO1	1	1	1	27.7645	1	1	1	38.5426	49.8381	1	32.5328
G6PD	70.627	58.5171	1	67.2562	60.9052	1	43.4739	1	1	1	1
GAB3	126.294	171.021	1	41.2788	70.8126	1	106.089	89.966	1	1	1
GABARAPL1	97.2345	126.983	1	154.266	156.65	1	1	1	88.0001	1	1
GABPA	1	1	1	39.2735	1	1	41.4699	1	1	1	26.8333
GADD45A	1	1	1	1	1	1	1	1	283.034	1	1
GADD45G	1	1	1	1	1	1	1	1	182.314	1	133.895
GALC	95.0332	37.3891	1	1	1	1	45.0334	43.5991	1	1	1
GALK1	1	93.5329	1	1	1	1	1	1	1	1	81.5639
GALK2	59.3281	55.8044	1	1	1	1	1	1	1	1	1
GALNT1	1	1	1	40.895	1	1	1	1	1	1	33.9006
GALNT11	40.5573	37.5645	1	1	1	1	1	1	1	1	1
GALNT2	1	1	1	54.7858	1	1	1	1	1	1	1
GANC	1	1	36.8448	1	1	1	1	1	1	1	1
GATAD2B	1	1	28.5828	26.7867	1	1	1	1	1	1	22.2498
GBA	1	78.7365	1	59.4152	1	1	1	1	75.1402	69.8395	54.3488
GBA2	1	1	1	1	1	1	40.7847	1	1	1	1
GCDH	100.255	1	89.4455	55.5265	1	72.1021	76.3088	70.5171	1	1	41.4836
GCH1	1	72.8865	1	58.4455	1	1	60.1117	1	1	108.432	68.8499
GCLM	1	67.8792	1	1	76.0869	1	77.4272	67.6295	1	1	1
GCN1	1	1	37.8298	1	1	1	37.2104	1	1	1	36.5082
GCNT1	1	1	1	32.9477	1	1	1	1	43.2717	1	1
GCOM1	33.2521	1	29.1475	27.2935	1	35.4428	1	1	1	41.2893	1
GCSAM	1	1	98.1619	1	1	72.2839	1	1	1	1	1
GDE1	1	85.108	1	71.2892	1	1	88.5821	82.1815	84.286	85.86	126.258
GFI1	1	56.4131	1	59.3402	1	1	1	1	1	1	1
GFM2	1	59.3478	1	40.4411	37.6862	1	51.6182	44.3478	45.3382	1	31.686
GFOD1	1	1	1	46.7817	1	1	1	1	1	1	1
GGA2	1	60.9549	1	111.694	73.7665	1	50.5019	57.2238	37.1233	1	38.0673
GGCT	1	1	1	64.6653	1	1	1	1	64.4293	1	79.7178
GGT1	1	1	1	1	1	1	1	1	36.8747	1	1
GIMAP8	59.7681	93.349	82.1331	1	65.6375	104.827	63.5409	59.1777	1	1	1
GINM1	1	1	1	1	1	1	1	1	77.5374	1	1
GJA9.MYCBP	1	63.7452	1	64.3647	1	1	87.7744	89.439	56.3152	84.6895	83.3562
GK	1	1	1	1	1	1	1	1	37.1378	1	1
GK5	1	26.2431	1	1	1	1	28.3535	1	1	1	1
GLA	1	1	1	72.0853	1	1	1	1	1	1	1
GLCCI1	42.1672	36.2552	1	1	1	1	48.3547	38.5267	68.6794	1	45.2285
GLDC	1	1	1	37.302	1	1	1	1	1	1	1
GLMN	82.8828	61.2231	1	50.693	61.2615	1	1	64.2019	43.8539	1	56.7717
GLMP	1	1	1	1	1	1	1	1	89.4623	86.602	1
GLRX5	1	74.3767	1	61.0825	1	1	109.064	1	1	1	1
GLUL	57.5159	114.667	1	1	66.5167	1	106.15	46.0148	1	1	1
GLYCTK	1	1	1	1	1	1	54.3886	1	1	1	1
GMDS	1	88.768	1	131.603	55.5932	1	50.3621	1	58.992	71.0929	63.2469
GMEB1	1	1	1	58.9997	1	1	1	1	1	1	1
GMFB	1	1	1	1	1	1	1	54.7491	47.4721	1	81.9244
GMNN	1	1	1	74.2296	1	1	1	1	1	1	74.6521
GMPPA	88.6196	1	1	83.2448	1	1	1	1	70.2391	1	72.2828
GMPPB	1	1	1	67.7125	1	1	1	1	1	1	1
GNA15	1	1	1	1	1	1	1	1	85.8264	1	96.206
GNG4	1	1	1	1	1	1	1	1	1	1	46.7754
GNGT2	79.1897	1	1	91.5647	1	1	1	1	1	1	1
GNL3L	1	1	1	1	1	32.3734	1	1	1	1	1
GNLY	324.911	7461.69	670.882	359.674	445.298	1	7982.4	1	1	1	1
GNPDA1	91.9748	1	1	1	1	1	1	95.9667	86.8121	1	1
GNPTAB	42.8631	71.5704	1	65.1636	38.7606	1	69.769	1	47.7555	1	1
GNS	1	61.5046	1	48.7735	46.7237	1	65.0108	1	45.4087	1	1
GOLGA3	1	24.7974	1	23.4725	1	1	1	1	1	1	1
GOLIM4	1	1	1	94.3167	1	1	1	1	1	1	1
GOPC	1	1	37.6875	33.0128	1	1	27.2507	37.5362	1	1	1
GOSR1	37.49	1	1	1	1	1	31.283	1	26.9528	1	1
GOT1	1	1	1	78.019	1	1	1	1	1	1	1
GPA33	1	1	1	1	1	1	1	1	1	100.479	1
GPALPP1	1	1	1	33.732	1	1	1	1	1	1	1
GPAT4	37.1033	1	48.8231	35.5752	1	1	1	1	1	1	31.6206
GPATCH4	1	1	53.4412	50.0324	68.9273	68.0071	1	1	1	1	1
GPD1L	58.8363	1	1	1	1	1	1	1	1	1	1
GPD2	1	1	1	32.7685	1	1	1	1	1	1	1
GPHN	1	1	1	1	1	1	1	1	37.8739	1	1
GPKOW	69.0263	1	1	1	1	1	64.9699	1	1	1	1
GPN2	1	1	1	1	1	1	77.3082	1	1	1	1
GPN3	1	1	83.8603	1	1	1	1	1	1	1	1
GPR137B	1	1	1	86.7037	1	1	1	1	65.1714	1	69.0317
GPR155	1	1	65.2138	1	1	38.6785	1	1	40.4454	56.5887	1
GPR171	1063.2	248.565	326.168	491.878	568.997	288.644	275.838	594.406	1	204.603	471.27
GPR183	350.669	235.6	604.774	1	367.004	1419.72	297.148	1033.61	346.811	1158.89	119.38
GPR25	1	1	1	117.619	1	1	1	1	1	1	1
GPR68	59.5807	61.473	1	91.9871	85.799	1	66.6691	58.2659	46.3481	1	66.5738
GPX7	1	1	1	1	1	1	1	1	1	1	101.546
GRAMD3	1	1	1	1	1	1	1	1	53.7469	1	1
GRAP	1	1	62.115	49.0073	1	89.8659	1	49.0633	48.5444	66.9518	1
GRINA	1	1	1	1	1	1	1	1	50.7774	1	24.7916
GRN	1	86.2793	1	1	1	1	1	76.9697	170.667	1	79.5272
GRPEL2	1	1	1	1	1	51.6386	1	1	61.5357	68.9312	1
GRWD1	39.581	1	1	1	1	1	1	1	1	1	1
GS1.124K5.11	1	27.5144	1	1	1	30.0364	1	1	1	1	1
GSAP	1	49.2641	1	1	1	1	39.5585	1	1	1	1
GSKIP	1	1	1	65.6509	1	1	1	1	73.6048	85.1749	68.129
GSR	47.6964	1	1	1	1	1	1	1	1	1	1
GSTM2	1	1	1	1	1	48.7296	1	1	1	1	1
GTDC1	102.152	49.3155	1	45.3133	60.6233	1	1	1	1	1	55.642
GTF2E2	109.643	1	1	82.6213	1	1	142.538	86.9906	91.2428	1	96.4301
GTF3C1	67.6896	45.7997	37.4819	62.0688	38.6925	1	1	1	1	1	1
GTF3C3	1	1	1	1	1	1	1	1	1	1	32.492
GTPBP8	1	1	1	1	1	75.8775	1	1	1	1	40.3978
GUCD1	1	52.8766	1	48.1613	1	1	1	1	40.3583	1	44.1092
GUSBP11	1	1	41.1115	31.3731	34.0264	44.5004	1	1	1	40.8048	1
GUSBP4	1	1	33.5353	1	1	1	1	1	1	1	1
GYS1	1	1	1	51.7091	1	1	1	1	41.7108	1	57.2102
GZMA	3330.56	3259.04	507.34	3824	4706.21	229.841	4252.19	3343.26	1	1	1906.75
GZMB	1	3288.53	1	3514.69	700.105	1	2346.19	1	1	1	1
GZMH	450.836	5259.92	1	1422.38	2060.54	1	6383.39	1012.7	1	1	1
GZMK	2704.69	685.348	1437.24	766.841	3999.93	279.675	766.138	2666.01	1	1	367.279
H2AFJ	1	1	1	1	1	1	1	1	21.5215	1	1
H2AFX	1	1	1	39.5877	1	1	1	1	1	1	1
HACD1	1	1	1	1	1	1	1	1	62.204	60.937	1
HADH	1	96.9814	63.3453	79.0497	1	1	1	1	69.3805	1	73.5053
HAPLN3	1	1	100.955	98.5882	1	147.238	1	1	161.273	267.087	153.798
HAUS4	1	1	1	1	1	83.4983	1	1	1	1	89.8412
HAUS5	1	1	1	43.127	1	1	1	1	1	1	1
HAVCR2	1	1	1	929.65	109.708	1	1	1	232.965	1	208.052
HBS1L	1	1	38.1536	36.647	1	1	1	1	31.7532	29.8642	30.5258
HDAC7	1	1	1	36.8748	1	34.7391	1	1	64.3626	33.2684	35.2935
HDDC3	1	89.2391	78.9682	1	1	107.869	1	1	90.6529	1	1
HDGF	1	1	1	36.3118	1	1	1	1	44.0381	1	56.3862
HDHD3	66.3349	1	1	1	1	1	1	1	1	1	1
HEBP2	1	1	1	1	1	1	1	1	1	74.563	1
HECTD3	1	65.673	65.2831	1	56.4319	1	56.7997	1	35.932	80.167	1
HELQ	1	1	58.4574	1	53.3171	69.1912	88.2428	50.007	1	63.1511	1
HEMK1	1	1	41.3749	1	1	1	1	1	1	1	1
HENMT1	115.255	143.905	85.9075	117.658	90.3169	1	98.8282	1	1	1	82.0491
HERC4	33.626	1	32.6446	1	32.1142	36.2702	1	31.455	24.412	33.7662	1
HERC5	1	1	1	1	1	1	1	1	1	95.1485	1
HERC6	1	1	1	40.2016	1	45.362	1	1	47.9025	56.945	1
HIF1AN	1	1	43.6	1	1	1	32.7099	1	1	1	52.161
HIPK3	1	1	1	30.0598	1	1	1	34.1534	1	1	1
HIST1H2AC	1	1	1	123.359	1	1	1	1	141.773	1	180.693
HIST1H2AM	1	1	1	98.7145	1	1	1	1	1	1	114.794
HIST1H2BK	88.834	73.224	1	150.246	117.542	1	1	92.7703	133.063	85.0718	141.192
HIST2H2AC	1	89.4463	123.452	85.595	79.9546	112.667	1	53.4579	1	1	46.5235
HIVEP2	33.4139	1	46.2673	1	1	53.1179	1	1	1	41.4113	1
HIVEP3	1	24.4623	1	1	1	1	21.0539	1	22.0716	1	1
HKR1	1	1	49.0233	1	1	1	1	1	1	1	1
HLA.DMA	1	20.6332	1	61.9136	33.3636	1	1	1	34.0092	1	30.2664
HLA.DQA1	1	46.4654	1	69.6412	84.6982	1	51.2177	1	88.873	47.8695	1
HLA.DQA2	1	1	1	18.6916	1	1	1	1	1	1	1
HLA.DQB1	1	33.7747	1	80.4701	66.5687	1	35.3267	31.5943	53.9379	47.2921	41.9272
HLA.DRA	1	145.138	1	353.041	205.665	1	116.253	90.3382	114.046	131.012	196.976
HLA.DRB1	1	241.922	1	367.604	353.029	1	244.876	162.858	252.2	224.743	249.42
HLA.DRB5	67.7073	885.209	188.682	1364.45	1155.75	1	680.759	504.357	757.364	766.964	993.854
HLA.DRB6	47.9254	412.139	100.938	693.142	622.716	1	371.764	250.986	425.335	372.631	483.278
HLTF	50.7246	1	1	29.6822	1	1	1	1	1	1	1
HLTF.AS1	74.8675	1	1	71.5951	1	1	1	1	1	1	1
HMCES	75.8942	1	1	114.841	89.2585	1	98.5015	88.1195	126.851	1	131.229
HMG20A	64.4341	51.7581	66.0242	45.9584	1	1	1	1	48.7122	52.9845	1
HMGCL	1	1	1	52.5305	1	1	1	1	1	51.2368	1
HMGXB3	1	1	1	1	1	1	1	1	1	1	36.3228
HMOX1	1	1	1	93.0143	1	1	1	1	1	1	1
HNRNPUL2.BSCL2	1	42.1583	1	40.1179	1	57.0474	43.6085	42.6529	33.0856	1	32.1328
HOPX	308.839	383.318	1	405.513	250.596	1	555.292	283.901	1	1	1
HOXB2	1	1	1	1	1	56.5744	57.5459	54.5721	89.3692	103.262	45.9087
HPGD	112.545	1	1	1	1	1	1	1	93.943	105.877	1
HPSE	1	1	1	1	1	1	1	1	37.4224	1	1
HSD17B12	84.5699	1	1	1	1	1	1	1	1	1	1
HSD17B4	1	76.4431	1	1	1	1	1	1	1	1	1
HSD17B7	1	1	1	47.0843	1	1	1	1	1	1	1
HSF2	1	1	1	1	1	64.6211	1	1	1	1	1
HSPA14	1	1	1	35.6629	1	1	40.3267	1	30.3108	1	37.8254
HSPA1A	1	1	1	53.0349	72.8688	1	34.2453	64.3487	74.769	23.8348	26.4767
HSPA1B	1	1	1	1	1	1	1	1	44.32	1	1
HSPA1L	1	1	1	1	1	1	1	1	16.2108	1	1
HSPBP1	1	54.0684	1	61.1883	1	1	1	1	1	1	64.5563
HUS1	88.6438	1	55.447	57.0908	65.0607	68.3079	67.1996	69.8379	1	1	1
HYOU1	1	1	1	1	1	1	1	1	28.2214	1	1
HYPK	1	37.8837	1	1	35.8781	38.5387	1	1	1	1	1
ICA1	1	1	1	1	1	1	1	1	103.391	52.7402	68.1324
ICAM1	141.029	1	1	1	1	1	1	1	67.6719	1	67.9568
ICE2	1	1	1	1	1	27.5215	1	1	1	1	1
ICMT	1	1	1	37.8738	1	1	1	1	1	1	1
ID3	1	1	98.643	212.539	1	151.953	1	1	163.795	259.617	1
IDE	1	1	1	1	1	1	1	1	33.7999	61.5576	34.7784
IDH3A	1	1	1	42.0024	1	1	1	1	57.9364	80.6789	1
IDI2.AS1	52.3736	51.8887	1	62.6819	78.6547	1	57.4679	58.608	64.3427	1	68.2553
IER5	1	1	1	1	1	1	1	1	44.9976	1	1
IFI30	1	1	1	103.89	1	1	1	1	156.252	1	121.528
IFIH1	1	1	1	52.0626	1	1	1	48.2346	58.2692	1	35.9291
IFNG	1	181.179	1	893.541	349.566	1	166.08	267.377	1	1	588.071
IFNGR1	856.827	204.525	141.789	1	337.007	124.239	290.677	534.674	133.397	123.018	103.788
IFNGR2	1	1	37.3381	1	1	77.2735	1	1	1	57.9006	1
IFRD1	40.9909	1	53.8342	29.097	44.6931	1	1	1	33.7762	1	1
IFRD2	137.211	1	83.256	76.0951	71.8803	99.8189	1	75.2961	58.8865	1	1
IFT57	1	1	1	1	1	57.0348	66.8144	57.0462	1	1	1
IGF2R	1	29.5294	1	1	1	1	25.5738	1	28.0141	1	1
IKBKG	1	17.288	1	1	1	1	21.6937	1	1	1	1
IKZF2	47.5432	1	1	1	1	1	1	1	109.22	67.4932	1
IKZF4	1	1	1	1	1	1	1	1	90.7639	1	1
IL11RA	1	1	49.114	1	1	63.8224	1	1	1	62.4042	1
IL12RB2	73.3858	1	1	1	1	1	1	87.7716	185.504	1	53.6174
IL15RA	1	1	1	1	1	1	1	1	53.0188	1	1
IL17RA	1	1	35.453	1	1	27.0913	1	26.2168	1	36.9046	1
IL18R1	190.384	1	1	1	1	1	1	155.73	160.838	1	107.649
IL18RAP	554.718	106.155	1	65.0278	79.3172	1	280.823	279.688	1	1	95.5214
IL1R1	1	1	1	1	1	1	1	1	100.407	1	1
IL1R2	1	1	1	1	1	1	1	1	228.712	1	1
IL21	1	1	1	1	1	1	1	1	1	1	305.674
IL21R	1	49.2587	61.1734	87.6538	52.3383	1	1	1	147.553	70.5115	40.8572
IL21R.AS1	1	1	1	81.5178	1	1	1	1	122.191	1	43.519
IL23A	1	1	1	1	1	145.422	1	1	1	1	1
IL23R	129.859	1	1	1	1	1	1	1	1	1	1
IL24	1	1	57.4183	1	1	54.7962	1	1	1	78.0234	1
IL2RA	1	1	1	1	1	70.9577	1	1	727.189	527.997	1
IL4I1	64.9643	1	1	1	1	1	1	61.1528	37.2117	1	22.5441
IL4R	1	1	29.735	32.6406	1	48.2258	1	1	64.4862	1	40.4116
IL6R	1	1	1	1	1	66.6254	1	1	1	87.5095	45.3774
IL6ST	1	1	85.4939	35.3484	1	118.94	1	46.4371	50.3511	53.9043	99.0577
IL7	1	1	1	1	1	1	1	1	76.5007	1	1
IL7R	1894.93	290.552	1552.65	1	293.111	1796.73	798.982	1561.33	392.727	298.427	213.46
ILVBL	1	1	1	55.1584	1	1	1	1	1	1	1
IMPDH1	75.4525	1	1	1	1	1	1	1	1	90.0896	1
ING3	1	1	1	1	1	1	1	1	1	40.6198	1
INO80E	1	1	42.6078	18.8755	1	1	1	1	1	1	1
INPP1	1	1	1	83.7167	1	1	1	1	91.8755	1	66.9081
INPP5F	1	1	1	42.5913	1	1	1	1	59.8555	1	1
INSIG1	1	75.9978	1	94.9077	83.0542	1	102.137	1	75.814	60.4334	69.2052
INSIG2	85.8852	1	1	1	1	1	1	1	1	1	1
INTS12	1	1	1	78.2932	1	1	63.1708	1	1	1	1
INTS4	1	1	1	24.2491	1	1	46.5824	1	1	50.6928	32.1294
INTS6L	48.7266	1	74.6426	61.6437	1	1	1	1	1	1	33.6043
INTS7	1	1	1	59.3746	1	1	1	1	1	1	1
INTS9	1	1	1	76.004	1	1	1	1	51.4035	1	40.0577
IP6K1	57.4871	1	1	41.2979	1	1	1	1	42.231	43.3252	1
IPO5	1	1	33.0109	1	1	1	1	1	1	1	1
IPO9	1	30.1956	1	24.7058	1	1	34.29	1	1	1	20.3992
IQCB1	1	1	87.277	47.4215	75.1403	70.5094	59.7915	1	53.2809	1	49.6418
IRAK1	1	1	1	1	1	1	48.6957	1	1	1	53.4134
IRF4	1	1	1	33.1222	1	1	1	1	34.9849	1	1
IRF5	1	1	1	1	1	1	1	1	82.7571	1	50.63
IRF8	1	1	1	79.9429	1	1	1	1	1	1	1
ISG20L2	64.5231	1	1	66.9442	69.8783	1	77.2579	1	60.9737	1	1
ISOC1	88.2676	115.533	85.7707	96.9333	111.976	1	1	118.92	173.742	1	126.651
ISYNA1	1	1	64.4662	1	1	1	1	1	1	1	1
ITGA1	1	1	1	65.6982	79.7125	1	1	1	1	1	1
ITGA5	60.3997	65.7789	50.5099	1	1	75.6855	77.3154	76.3912	1	1	1
ITGA6	1	1	49.5963	1	1	62.3734	1	1	1	46.202	1
ITGAE	50.2103	1	1	348.874	139.605	1	25.5138	45.0209	49.5368	1	38.8836
ITGAM	1	107.559	1	1	1	1	105.819	1	1	1	1
ITGB3BP	1	1	1	1	1	1	1	1	1	1	55.373
ITM2C	167.27	1	103.385	103.79	219.993	1	138.718	150.711	1	1	1
ITPKB	1	29.6618	43.1807	1	1	41.9982	1	1	1	1	33.8918
ITPR1	24.061	1	1	27.5526	1	1	1	25.9799	30.7256	1	27.8466
ITPRIP	1	1	1	41.3271	1	1	1	1	1	1	1
JADE1	1	1	53.4652	1	1	1	1	1	1	1	1
JAK2	1	1	1	40.0396	1	1	1	43.0512	38.9966	1	1
JAKMIP1	1	93.5666	1	92.6213	73.6299	1	79.1008	1	58.7013	85.3819	47.4087
JAKMIP2	1	32.7442	1	1	1	1	1	1	1	1	1
JAKMIP2.AS1	1	58.0726	1	1	1	1	1	1	1	1	1
JAML	643.532	1	214.84	293.654	332.016	148.368	1	292.209	107.216	242.696	111.504
JARID2	1	1	1	29.7409	1	1	1	1	28.1693	1	33.3759
JAZF1	1	1	1	1	1	1	1	1	55.6479	1	1
JMJD4	1	1	63.4092	124.819	1	1	1	1	1	1	64.0656
JMJD6	1	35.8671	1	48.8113	46.0016	1	43.3698	52.2381	37.0157	1	57.1515
JOSD2	1	65.6609	1	64.0678	1	1	44.6456	58.5852	70.805	1	53.4315
JPX	1	1	36.3129	1	37.4547	43.1466	31.8672	1	1	39.5143	22.7784
JUN	353.343	83.4324	1	265.752	314.991	1	130.711	408.191	181.854	1	131.622
JUND	27.4935	1	1	35.8974	71.7309	1	1	57.1291	80.6919	1	26.2373
KANSL3	1	32.4962	41.6014	35.3946	33.3724	1	1	35.9981	37.9466	1	35.3914
KAT14	1	1	1	1	1	1	51.7416	1	1	1	1
KAT8	1	1	65.1851	1	1	1	1	1	1	1	1
KATNA1	1	79.1223	1	54.1268	1	1	62.9866	77.56	71.0652	1	42.1303
KATNB1	1	1	1	61.0043	1	1	1	1	1	1	58.0849
KBTBD2	50.553	1	1	50.4109	62.7997	44.5073	41.1807	54.5309	47.1437	1	1
KBTBD4	1	1	75.1425	1	1	1	1	1	1	1	1
KCNK5	1	1	1	61.9097	1	1	1	1	1	1	1
KCNN4	1	1	1	1	1	1	1	1	102.13	83.3482	64.3549
KCTD10	1	1	1	1	1	1	1	1	1	1	33.6831
KCTD13	1	49.9993	51.8194	40.1125	1	49.6958	1	1	1	68.5912	43.8388
KCTD5	1	1	1	68.3932	1	1	1	1	1	1	1
KCTD7	64.1593	51.4477	1	1	40.8565	63.214	63.0613	68.6423	1	56.7415	1
KDM2B	1	1	1	1	1	1	27.4497	1	30.484	1	1
KDM3A	1	1	42.8436	1	1	56.7154	40.0186	1	1	62.6573	31.2741
KDM5B	1	1	1	27.1855	1	1	1	1	48.8807	30.7903	26.3503
KDM5C	1	1	1	1	1	1	1	1	1	1	27.3457
KDM6A	1	1	1	26.3113	1	1	1	1	1	1	28.7831
KDSR	1	1	1	1	1	66.4041	1	80.6452	51.4556	87.0389	1
KIAA0101	1	1	1	96.5958	1	1	1	1	1	1	159.789
KIAA0355	1	1	1	1	1	1	1	1	1	39.4396	1
KIAA0430	1	31.2309	33.2266	1	39.4836	35.151	1	1	31.1584	51.3248	1
KIAA0586	1	1	1	30.8786	38.7699	40.7796	1	1	1	1	1
KIAA1429	1	46.2843	39.3236	33.5524	1	41.8208	1	1	1	1	31.8507
KIAA2026	1	1	1	1	1	1	1	36.286	1	36.6647	1
KIF11	1	1	1	1	1	1	1	1	1	1	50.4413
KIF20B	1	1	1	59.442	1	1	1	1	53.6855	1	46.9734
KIF21A	1	40.8496	1	1	53.3404	1	42.0955	1	1	1	1
KIF3A	1	1	1	1	1	1	1	1	1	1	42.0601
KIFAP3	1	51.5836	53.1079	57.5	1	1	1	1	46.223	1	1
KIN	1	1	1	1	1	1	31.4579	1	1	1	1
KIZ	79.3594	105.268	1	56.1853	106.512	86.6074	121.675	84.293	1	82.7915	1
KLF10	1	97.2887	1	1	1	1	62.0144	66.5292	59.032	82.2886	1
KLF2	47.9941	170.273	283.816	1	1	329.85	250.195	1	1	145.853	1
KLF3	1	55.4421	61.9359	1	1	54.9172	69.4259	1	1	70.4428	1
KLHDC4	59.6175	60.2882	45.2152	43.8366	63.332	1	63.4467	1	1	1	46.5516
KLHL12	1	1	1	48.7992	1	1	1	1	1	1	55.0033
KLHL2	1	1	1	1	1	1	1	1	44.4978	1	1
KLHL20	60.6564	61.8179	42.9674	1	1	1	85.7041	55.5857	55.8714	1	1
KLHL21	1	1	1	1	1	1	1	1	1	47.3787	1
KLHL22	1	1	1	1	1	1	1	1	1	76.6503	1
KLHL6	1	1	1	1	1	36.8203	1	1	1	1	1
KLRA1P	1	59.6729	1	1	1	1	1	1	1	1	1
KLRB1	5330.59	653.338	151.41	827.896	1087.68	715.276	1092.88	2371.67	327.218	271.305	1865.87
KLRC1	130.018	94.228	1	289.24	256.219	1	1	1	1	1	1
KLRC2	1	171.267	1	264.643	176.092	1	1	1	1	1	1
KLRC3	1	203.806	93.8417	239.029	195.364	1	1	1	1	1	1
KLRC4	1	448.724	517.298	586.194	410.899	1	1	1	1	1	1
KLRC4.KLRK1	727.208	2155.35	1952.27	1751.65	2053.22	1	197.287	1	1	1	1
KLRD1	95.2557	998.693	1	378.883	257.018	1	1	1	1	1	1
KLRF1	1	372.708	1	1	1	1	1	1	1	1	1
KLRG1	2075	1354.03	290.965	245.092	755.5	160.018	1448.9	519.107	1	1	1
KLRK1	1035.05	2920.6	2617.05	2274.75	2812.68	1	287.218	1	1	1	1
KMT2E.AS1	28.0086	1	1	25.4261	1	1	1	1	1	1	1
KMT5B	1	1	1	1	1	1	38.9722	1	1	1	1
KNTC1	1	1	1	1	1	1	1	1	1	1	32.3507
KPNA2	1	1	1	217.54	113.379	1	1	108.838	141.207	1	273.911
KPNA5	50.9574	1	54.5263	1	1	48.2305	1	1	1	1	1
KRBOX4	1	1	1	1	1	59.7059	1	1	1	1	1
KRT86	1	1	1	129.011	1	1	1	1	1	1	1
L3MBTL2	1	1	1	45.4545	1	1	1	1	53.1414	1	55.1426
LAG3	110.854	76.7049	1	271.599	139.241	1	1	1	1	1	1
LAGE3	1	1	1	1	1	1	1	1	1	1	30.9814
LAIR1	83.2714	137.913	94.3147	1	1	72.8268	106.407	71.1431	1	1	1
LAIR2	1	82.5512	1	1	1	1	75.7103	1	491.502	97.4689	79.5892
LALBA	1	1	1	1	1	124.358	1	1	1	1	1
LAPTM4B	1	1	1	1	1	1	1	1	182.07	1	1
LARP1	1	1	1	1	1	1	1	1	30.1683	1	1
LARP4	1	1	1	1	1	1	1	1	30.3097	1	1
LAT2	1	1	1	172.749	1	1	1	1	98.1673	1	1
LAYN	1	1	1	155.553	1	1	1	1	307.968	1	1
LCLAT1	1	1	27.3147	1	1	1	1	1	1	1	1
LDAH	1	1	1	47.2116	1	1	1	1	1	1	1
LDB1	1	1	49.1699	1	1	1	1	39.013	40.0248	1	1
LDLRAD4	1	1	1	1	1	1	1	1	25.4991	1	1
LDLRAP1	87.1581	87.9592	604.028	1	76.1923	453.443	97.9053	103.796	1	290.536	1
LEF1	1	1	508.079	1	1	463.079	1	71.6232	1	459.722	1
LEF1.AS1	1	1	70.4147	1	1	66.7535	1	1	1	49.7244	1
LENG9	1	1	24.2546	1	1	26.6694	1	22.6471	19.811	16.8192	1
LGALS3	110.649	1	1	160.446	170.765	1	1	177.816	393.116	336.387	286.347
LGALS3BP	1	1	170.118	76.8065	1	220.754	1	203.031	210.152	103.308	305.948
LGALS8.AS1	1	1	1	1	1	1	1	1	1	1	23.0774
LGALS9	1	1	1	89.0745	1	77.7848	1	1	78.6038	106.893	107.081
LGR6	1	68.5025	1	1	1	1	75.0693	1	1	1	1
LIG1	1	1	1	50.7152	1	1	1	1	41.6962	1	59.2678
LILRB1	1	145.297	1	1	1	1	1	1	1	1	1
LIMA1	1	1	1	1	1	1	1	1	66.9206	1	75.6255
LIMK1	1	1	1	40.0254	1	1	1	1	1	1	1
LIMK2	1	1	1	1	1	46.9447	1	1	1	67.6022	1
LIN37	1	90.9697	1	60.3705	1	1	1	1	1	67.1261	1
LIN52	1	1	1	56.063	1	1	1	1	1	1	66.6736
LIN7C	66.9669	1	55.2272	1	1	45.7243	41.3502	55.0646	1	47.1443	1
LINC00094	34.5388	33.8414	45.209	1	38.7828	41.3774	29.9517	1	1	1	1
LINC00116	1	1	32.6502	1	1	1	1	1	1	1	1
LINC00299	1	1	1	61.7794	1	1	1	1	1	1	1
LINC00324	1	62.8331	1	44.7737	1	69.6561	1	63.5605	1	68.5745	1
LINC00339	1	1	60.6055	1	1	1	1	1	1	1	1
LINC00426	1	1	1	70.8995	73.0628	59.0349	1	1	71.9621	183.568	99.4739
LINC00476	1	1	20.0304	1	1	1	1	1	1	1	1
LINC00612	244.485	195.917	1	1	111.836	1	177.251	105.829	1	1	1
LINC00674	21.9994	1	22.1884	1	29.5691	1	26.8274	1	1	1	1
LINC00892	1	1	1	1	190.044	89.3409	188.363	346.074	1	1	306.054
LINC00938	97.4731	1	94.1249	51.2234	1	81.936	1	1	1	100.501	1
LINC00944	1	136.182	1	1	1	1	173.425	91.302	1	1	1
LINC00963	1	1	1	60.1226	1	1	1	1	85.2815	1	85.108
LINC00987	60.4655	45.3773	1	1	1	1	1	1	1	1	1
LINC01089	1	1	48.1187	1	1	89.2273	1	1	1	76.245	1
LINC01550	1	1	80.0975	1	1	58.6193	1	1	1	25.2646	1
LIPE.AS1	1	1	1	1	1	1	1	1	26.3173	1	1
LIX1L	64.667	1	1	1	1	1	50.5032	56.1024	1	60.1823	1
LLGL2	1	59.5896	1	1	1	1	85.3773	1	1	1	1
LMBR1	1	1	44.8859	32.6481	1	43.4252	43.8393	1	36.9393	1	1
LMBR1L	1	1	1	1	1	65.5267	1	1	58.3264	1	1
LMBRD2	1	1	25.3005	1	1	1	1	1	1	1	1
LMCD1	1	1	1	1	1	1	1	1	66.1183	1	1
LMNA	1	1	1	1	1	1	1	1	65.2137	77.0407	1
LMNB1	1	1	1	45.8763	1	1	1	1	1	1	34.2499
LOC100129917	1	1	89.3505	1	1	1	1	1	1	1	1
LOC100129931	1	1	1	1	1	1	1	1	1	49.7589	1
LOC100130476	83.5655	1	1	111.885	96.2835	1	59.9257	140.739	91.2555	1	132.129
LOC100130872	1	49.2159	1	1	49.0191	1	54.6582	1	1	1	1
LOC100131626	1	1	44.4571	43.1409	1	1	1	1	1	1	1
LOC100132111	73.1351	1	1	1	1	1	1	1	1	1	1
LOC100133286	1	1	53.1515	1	1	51.4369	1	1	1	1	47.2816
LOC100506083	38.7681	1	1	39.0847	46.6701	1	1	1	47.9746	54.4426	39.2788
LOC100506639	1	56.9918	1	1	1	1	85.163	1	1	66.5026	1
LOC100630923	44.7944	1	1	39.5479	1	1	41.7943	1	1	1	1
LOC202181	1	1	59.3246	1	1	1	1	1	1	1	1
LOC220729	72.4552	1	83.1022	71.529	1	99.5433	78.6055	1	1	76.5742	1
LOC283788	30.4913	34.2035	38.2697	1	1	40.1595	36.9139	1	1	35.1123	1
LOC284454	1	1	1	1	1	1	1	85.3899	1	1	1
LOC389641	1	1	1	1	1	1	1	1	1	82.5751	1
LOC389831	1	1	1	38.6998	1	1	1	1	35.4449	1	1
LOC400927	1	1	1	1	1	1	28.198	1	28.1208	30.7076	32.0574
LOC440311	1	1	1	1	1	1	1	1	1	20.59	1
LOC642361	29.9059	23.5019	1	27.022	24.9076	1	1	1	1	1	19.6149
LOC728743	1	1	1	1	1	41.787	1	1	1	1	1
LOC728989	1	1	1	1	1	1	1	1	1	1	76.6071
LOC729683	1	1	48.5465	1	1	1	1	1	1	1	1
LPAR2	82.6053	1	1	1	1	1	1	1	88.2197	104.792	65.0893
LPAR5	1	1	1	68.0913	1	1	1	1	1	1	1
LPAR6	1	83.6059	71.7728	1	62.1899	230.701	116.811	88.3599	59.0593	305.506	52.0333
LPCAT1	45.9624	120.369	1	1	49.7128	1	90.2116	1	1	1	1
LPCAT4	46.9525	1	1	1	1	1	1	1	1	1	1
LPP	1	1	1	1	1	1	1	20.9929	26.1186	1	1
LRIF1	65.2029	47.0957	48.7319	1	1	1	63.9647	1	1	1	1
LRIG1	1	1	1	1	1	37.6004	1	64.3036	1	68.4828	1
LRRC41	61.9092	65.6962	1	67.7053	77.6904	1	1	63.6376	58.1389	1	65.4529
LRRC47	1	64.6497	58.3679	51.7848	1	62.5755	1	1	1	70.5705	1
LRRC57	1	1	1	1	1	1	1	1	1	1	42.9274
LRRC58	1	1	1	1	1	1	1	1	1	42.4076	34.5105
LRRC59	1	1	1	39.7689	1	1	1	1	1	1	1
LRRC61	1	1	1	1	1	1	1	1	76.6187	1	1
LRRC75A	15.1165	1	28.9112	1	1	24.3785	1	12.1497	1	13.4566	1
LRRC8D	1	1	38.6444	56.5918	1	66.432	1	1	1	64.4524	57.6673
LRRFIP2	1	40.0897	1	1	1	1	1	1	1	1	1
LRRN3	1	1	147.69	1	1	111.788	1	1	1	1	1
LRTOMT	1	1	1	1	1	1	1	1	1	28.5436	29.6781
LSM2	1	1	1	35.7977	1	1	1	1	25.2267	1	22.7286
LSM5	31.5761	36.7199	48.5629	1	1	44.5149	1	1	29.8064	1	34.0245
LSM8	1	1	22.6696	14.7476	1	1	1	1	16.8744	1	1
LSMEM2	52.7969	1	1	1	1	1	1	1	1	1	1
LSR	1	1	79.5293	1	1	61.004	1	1	39.6463	1	1
LST1	23.0581	1	1	1	1	1	1	1	1	1	1
LTA	1	1	1	1	1	1	1	1	31.7912	1	1
LTB4R	1	1	1	1	1	1	38.455	39.2624	1	1	1
LTB4R2	1	1	1	1	1	1	44.9234	42.9818	1	1	1
LTBP4	1	40.4646	1	1	1	1	48.2312	1	1	1	1
LTK	80.1127	1	1	1	1	1	1	1	1	1	1
LTV1	66.6062	1	1	50.5106	1	1	1	1	1	1	1
LUZP1	29.3147	1	1	1	1	1	31.5435	33.6628	30.2214	1	26.1975
LXN	1	1	1	1	1	1	1	1	1	1	75.2446
LYPLAL1	1	1	100.935	1	1	1	1	1	1	1	1
LYRM1	62.5156	1	1	58.0471	1	1	1	1	1	1	1
LYRM4	1	1	1	1	1	1	1	1	1	1	45.193
LYRM7	1	1	55.6447	1	1	46.8914	1	1	1	1	1
LYST	23.7966	41.4047	1	128.576	67.9491	1	1	1	44.178	1	54.3155
LZIC	1	71.7901	1	83.5413	1	73.1202	70.7422	1	67.9195	1	44.9942
MAD2L1	1	1	1	172.794	1	1	1	1	1	1	187.219
MAD2L1BP	86.568	1	1	97.5454	96.9962	1	104.68	86.5567	115.834	96.1077	104.15
MADD	1	45.2545	1	34.007	1	1	37.9886	1	1	43.0129	1
MAGED1	69.4544	58.9457	83.7516	68.0495	1	1	1	1	61.5579	84.9058	48.886
MAGEH1	1	1	100.16	83.8705	1	125.075	1	1	366.698	177.211	151.976
MAGOHB	1	1	36.2797	1	1	1	1	1	1	1	1
MAK16	1	1	47.8739	46.348	1	47.0053	1	1	1	1	1
MAL	1	1	510.565	1	1	623.708	1	1	1	308.882	1
MALT1	1	1	46.907	1	1	73.7503	1	44.0184	46.1315	44.2994	1
MAML2	1	1	46.0154	1	1	32.0268	1	1	1	1	1
MAN2A1	1	1	41.7129	1	35.4953	42.2953	36.2377	46.4372	34.8941	1	40.6377
MAP1LC3A	1	1	1	63.06	1	1	1	1	82.5352	1	75.3996
MAP1S	50.9851	43.8367	1	40.6239	1	1	46.0134	1	1	1	31.0203
MAP3K1	1	1	1	1	1	73.6693	1	37.718	33.1413	92.5552	45.1655
MAP3K14	1	1	1	34.6509	1	1	1	1	30.1965	1	32.3427
MAP3K14.AS1	1	1	56.3587	1	1	1	1	1	1	1	1
MAP3K2	1	1	1	1	29.9576	1	1	1	22.4439	1	29.1448
MAP3K3	1	37.2656	43.7401	1	1	1	1	1	1	1	1
MAP3K4	1	1	1	1	1	29.63	1	1	1	1	1
MAP3K5	32.8638	1	1	1	36.0345	1	36.2087	50.9829	26.468	54.8376	31.3864
MAP3K8	66.7207	64.2979	1	58.8689	55.9813	1	1	69.8415	1	1	87.3623
MAP4K2	1	1	65.8058	1	1	62.1372	1	61.7908	51.2563	76.8224	1
MAP4K5	1	40.1339	1	1	31.8829	1	44.7289	31.1875	1	1	1
MAPK13	1	37.3433	1	38.0292	1	1	1	1	35.5429	44.2751	1
MAPK14	1	1	1	1	1	1	56.9092	1	1	37.0392	1
MAPK6	1	1	1	1	1	1	1	1	54.4038	1	1
MAPKAPK5	1	1	1	1	1	1	93.0834	1	1	1	1
2020-03-02	1	1	1	1	1	1	70.6076	1	1	1	1
2020-03-05	1	59.389	1	41.7074	47.823	1	1	1	1	1	55.8474
MARCKSL1	1	1	1	1	1	64.4686	1	1	1	1	1
MAST4	1	1	1	1	1	1	1	1	35.1704	29.0735	1
MASTL	1	1	1	1	1	1	1	1	1	1	41.1397
MATK	92.5146	167.822	1	1	107.048	1	85.602	1	1	1	1
MAVS	1	1	31.5664	1	1	1	1	1	1	1	1
MB21D1	1	1	1	50.8943	1	1	80.6499	1	52.9082	1	1
MBIP	1	1	1	76.4127	1	1	1	1	78.5887	1	70.3225
MBOAT1	131.943	1	1	1	71.7572	51.5034	1	107.672	106.205	102.234	92.6906
MBOAT7	1	1	1	1	1	1	1	1	64.9249	1	1
MCCC2	1	1	1	61.7022	37.4948	45.6147	1	1	79.8502	1	44.3405
MCM2	1	1	1	74.6989	1	1	1	1	1	1	75.5415
MCM4	1	1	1	1	1	1	1	1	1	1	76.4583
MCM5	1	45.2231	1	122.862	50.5791	1	1	1	78.8821	50.9524	110
MCM6	66.2123	1	1	157.962	73.7818	1	1	65.1155	87.38	1	167.825
MCMBP	63.3379	45.3915	1	40.246	1	1	60.9674	51.5227	1	60.9237	1
MCMDC2	1	1	16.334	1	1	17.9232	1	1	1	1	1
MCOLN2	1	86.4189	55.8938	78.4936	110.903	1	74.4923	62.2359	1	1	106.219
MCPH1	40.2055	53.5802	1	45.9102	45.0169	47.5348	1	1	1	1	1
MCTP2	1	29.1246	1	23.109	1	1	27.8158	1	1	1	1
ME1	109.34	1	1	1	1	1	1	1	1	1	1
ME2	56.5509	1	67.56	1	1	1	1	1	1	1	42.7219
MED1	1	1	1	29.2342	1	1	1	1	1	1	1
MED13	1	1	1	1	29.7435	1	32.5657	36.919	34.0231	1	19.5659
MED21	1	1	1	1	60.8427	1	66.1046	1	65.7599	1	1
MED24	1	1	1	45.5722	1	1	1	1	44.864	53.1957	49.1679
MED7	1	1	1	62.43	73.8042	1	69.7382	77.0067	77.6327	1	68.693
MEF2A	1	1	1	24.9239	1	1	1	1	1	1	1
MEF2D	1	1	1	21.7249	28.9387	1	1	1	27.3024	1	1
METAP1	58.669	41.3216	1	1	1	1	51.5741	45.7132	1	45.844	25.5096
METTL10	1	1	69.8124	1	1	1	1	1	1	1	1
METTL18	1	86.8387	152.615	101.665	1	1	1	1	1	1	1
METTL4	1	1	1	1	1	1	1	1	1	1	29.3714
METTL7A	1	1	1	1	1	1	1	1	42.9935	1	1
METTL8	1	1	1	1	1	1	1	1	33.6611	1	51.772
MFN2	1	1	1	1	1	1	1	1	1	1	33.8204
MFSD14B	1	1	1	1	52.4666	1	1	1	44.6754	1	1
MFSD14C	1	1	53.8259	1	1	1	1	1	1	1	1
MFSD5	87.6793	1	1	55.1728	1	1	81.5539	74.4604	58.9238	58.0227	1
MFSD6	1	1	1	61.2913	1	1	1	1	48.9696	1	44.8164
MGA	1	1	30.1028	22.2922	38.3517	1	39.3716	36.0508	1	1	1
MGAT4A	112.036	65.2542	94.8657	1	58.5366	91.2436	66.0122	90.0351	1	31.115	1
MGME1	1	1	1	49.3699	1	1	1	84.8978	99.5519	1	69.4975
MGRN1	1	1	1	24.9817	1	1	1	1	1	1	26.7207
MICAL2	1	1	1	1	1	1	1	1	38.0109	1	1
MICU1	1	1	1	52.3396	1	1	1	1	56.4624	1	36.036
MIEF1	1	1	1	1	1	1	67.3459	1	1	1	1
MIGA1	1	1	31.1015	1	1	1	1	1	1	1	1
MIGA2	39.708	1	1	1	1	1	1	1	1	1	1
MINK1	1	1	22.4571	1	1	32.7446	26.4489	1	1	35.9503	1
MIR101.1	1	1	96.8928	1	1	99.8642	1	1	1	1	1
MIR1204	1	1	1	264.514	1	1	1	1	699.667	471.649	455.292
MIR1244.1	89.7998	62.4798	51.9613	1	47.2607	1	40.3644	1	25.2306	1	1
MIR1260B	1	1	229.296	1	1	134.628	1	1	1	1	1
MIR134	1	1	1	1	1	276.301	1	1	128.656	1	1
MIR146A	1	1	1	1	1	1	1	1	83.4151	1	95.9952
MIR155	1	1	1	762.433	186.482	1	1	1	390.899	1	943.084
MIR155HG	1	1	1	363.56	83.2922	1	1	1	115.041	1	376.77
MIR181A1HG	1	1	1	1	1	1	1	1	84.8939	1	1
MIR21	1	1	1	1	1	1	1	1	95.6897	155.703	65.9483
MIR3188	183.799	1	1	96.0466	1	1	1	1	1	1	1
MIR3198.2	1	1	351.544	332.551	1	1	1	1	362.56	265.416	206.471
MIR3671	1	1	325.529	1	1	234.785	1	1	1	1	1
MIR3917	182.963	174.529	139.857	759.347	233.636	132.404	1	1	1	127.407	1053.7
MIR3918	368.839	596.959	1	569.698	612.659	1	769.827	481.516	485.52	1	241.566
MIR4685	1	1	1	1	1	1	1	1	1	1	25.3333
MIR4707	1	1	227.955	119.21	1	206.247	1	1	1	201.649	221.938
MIR4800	1	209.517	1	246.429	226.122	1	1	205.694	238.077	266.608	1
MIR564	1	1	155.442	1	1	1	1	145.433	1	1	1
MIR671	125.753	1	1	49.8887	1	1	1	1	1	1	1
MIR762	123.785	1	1	96.4573	1	1	172.564	141.55	1	1	1
MIR939	1	1	1	132.209	135.966	117.563	1	1	111.062	157.964	104.564
MIR943	1	129.162	137.102	89.0239	1	1	1	1	93.3271	149.284	106.669
MIS12	1	1	99.1147	1	1	1	1	1	1	1	1
MKI67	1	1	1	1	1	1	1	1	1	1	44.0911
MKKS	44.3305	1	68.8123	1	1	55.0171	1	1	1	1	46.2976
MKNK1	117.476	57.9565	1	35.0152	47.8019	1	44.2222	82.5642	96.252	1	46.5809
MKNK1.AS1	1	1	1	1	1	1	1	1	22.6268	1	1
MKNK2	1	1	1	1	1	1	18.275	1	29.4578	35.4123	22.0573
MLEC	1	35.0692	1	1	1	1	31.5112	1	26.3111	1	1
MLH1	1	64.1675	1	54.9849	68.509	1	1	58.7623	70.3641	1	77.7155
MLKL	1	1	1	69.2902	1	1	80.3887	1	115.004	74.1547	58.6008
MLLT10	1	1	1	1	1	1	1	28.8252	1	1	1
MLXIP	1	1	40.6074	1	1	1	1	1	1	1	1
MMD	80.591	1	1	1	1	1	1	1	1	1	1
MMGT1	1	1	55.4847	1	1	1	1	1	45.7311	1	1
MMP25	32.5283	1	24.7666	1	1	1	1	1	1	1	1
MNAT1	65.2896	1	1	43.6662	59.2634	1	1	1	1	1	1
MOB2	56.4386	62.5135	1	39.5431	1	47.5899	91.3543	1	1	68.8226	40.7326
MOB3C	74.3147	1	1	1	1	1	1	1	66.9103	1	1
MON1B	1	62.9438	1	62.9946	55.6947	1	66.6553	1	1	1	51.74
MORC2.AS1	1	70.773	1	1	1	89.5813	62.6638	1	1	72.1824	1
MOSPD3	63.918	1	1	70.8095	82.779	1	54.5821	104.041	1	1	1
MPHOSPH9	1	55.4073	59.683	86.7606	61.4272	57.7132	1	1	1	55.6148	77.986
MPI	1	1	126.214	1	1	98.2874	1	1	1	166.56	1
MPP7	1	1	1	1	1	42.5199	1	1	1	1	1
MPRIP	1	1	1	1	1	1	1	1	1	1	20.1603
MPZL3	151.888	1	1	70.9032	93.8951	46.1629	1	139.173	90.6599	1	48.8836
MRE11A	1	36.7445	1	36.7437	39.5071	1	1	1	1	1	1
MRM2	1	1	1	1	1	1	1	1	55.8663	1	1
MRPL1	1	1	74.0268	67.0735	95.2391	70.445	1	1	64.9428	80.1076	69.6801
MRPL12	113.865	1	1	120.934	117.528	1	73.8153	1	85.8346	1	97.6391
MRPL15	1	1	1	70.8618	1	1	101.147	91.12	71.0189	89.1461	1
MRPL17	1	1	64.5031	1	1	43.247	1	1	1	1	1
MRPL22	35.0222	1	1	34.1917	1	1	31.752	1	38.1895	1	28.3765
MRPL24	1	111.383	92.5488	1	1	103.528	1	1	76.8441	89.5576	1
MRPL27	1	1	1	54.8653	56.0115	1	1	55.8462	49.7151	48.9645	43.5448
MRPL35	1	1	1	1	1	1	1	1	48.637	1	1
MRPL40	1	1	119.716	112.131	121.645	112.241	1	106.34	119.28	86.8246	84.3851
MRPL45	1	1	80.9795	1	1	1	1	1	1	1	1
MRPL53	69.199	1	75.3118	65.9932	71.1872	74.925	1	1	102.314	1	61.1738
MRPS18A	1	1	1	71.8744	54.2846	1	1	1	51.9388	1	58.1025
MRPS2	1	64.4149	1	1	1	1	1	1	1	66.0089	69.7196
MRPS23	1	87.1554	1	67.1037	1	80.5423	1	68.2983	64.7488	85.4467	100.824
MRPS25	37.1526	42.6176	37.1692	1	1	48.9548	1	1	1	1	33.6546
MRPS33	83.4573	1	205.95	66.7145	1	97.3462	1	1	90.4072	76.1981	78.3728
MRS2	1	1	50.6122	1	1	1	1	1	1	1	1
MRTO4	1	1	1	1	1	1	1	1	1	1	46.7311
MS4A1	1	1	1	1	71.6867	1	1	1	1	1	1
MS4A6A	1	1	1	146.842	1	1	1	1	1	1	90.0583
MSC	1	64.2453	1	1	55.7509	1	1	1	1	1	1
MSH2	1	1	1	46.797	1	1	1	1	45.4248	1	38.1326
MSH3	1	1	1	1	1	56.7299	1	43.7395	1	1	1
MSH6	1	1	32.8284	1	1	1	1	1	1	1	1
MSRB1	1	1	1	66.6368	1	1	1	1	1	1	1
MT1F	1	1	88.6866	85.6817	1	1	1	1	1	1	1
MT1X	1	1	68.4268	98.7837	58.2624	1	1	1	68.2768	1	1
MTA2	1	49.5147	1	57.6215	1	1	1	1	1	1	50.8291
MTAP	1	1	1	1	1	1	1	45.0254	1	1	1
MTERF1	1	1	1	1	1	1	66.7551	1	1	1	1
MTERF2	1	1	1	1	1	1	62.9009	1	1	1	1
MTFP1	101.812	1	1	111.97	111.898	1	75.5488	114.31	75.4008	1	89.436
MTFR1L	1	1	67.7633	57.4474	1	1	1	1	60.7978	66.6028	53.1054
MTHFD2	1	1	1	202.645	1	1	1	82.0737	121.539	86.5777	250.205
MTIF2	1	1	64.4791	1	1	1	1	1	1	1	1
MTM1	1	1	73.9986	1	1	79.2223	1	77.3692	58.056	97.2497	89.4396
MTMR2	1	1	1	42.8373	1	1	1	1	1	1	1
MTMR6	62.088	1	1	46.1861	1	1	47.5607	1	59.007	1	72.6263
MTPAP	1	1	1	27.3415	1	1	1	1	1	1	1
MTRF1	1	1	74.7191	1	1	1	1	1	1	1	1
MTSS1	1	57.441	1	1	1	1	39.7352	1	1	1	1
MTX2	1	1	1	65.8906	1	1	1	1	1	1	88.5472
MUL1	1	85.0807	1	1	1	1	78.9411	1	69.8185	1	1
MUT	1	1	1	1	1	1	1	1	1	1	49.6749
MUTYH	78.4216	83.6332	129.131	1	1	62.2163	65.8193	60.7274	55.9354	1	1
MVB12A	1	56.5976	1	63.0226	1	1	1	1	55.5578	66.7585	61.0079
MVD	1	78.1183	1	55.8758	58.7822	1	1	1	59.7539	1	84.2926
MX2	1	1	26.926	1	1	46.269	1	30.0431	1	40.1924	1
MYADM	99.3522	47.0939	69.0285	1	70.3021	50.2698	116.175	101.29	1	1	44.4904
MYBBP1A	1	1	42.7374	1	1	1	1	1	1	1	1
MYBL1	63.9893	41.7035	1	1	1	1	54.4165	33.0151	1	1	1
MYC	149.242	1	500.249	1	1	450.905	1	72.8754	1	300.789	1
MYCBP	1	66.3807	1	67.1681	1	1	91.3943	92.5191	58.6964	88.3103	86.9183
MYL6B	1	1	1	29.4275	1	1	1	1	37.0205	1	25.5916
MYLIP	64.542	54.4991	61.5381	1	1	1	54.0337	51.674	57.3678	1	1
MYNN	64.2917	1	1	33.7908	46.8732	1	1	47.8937	1	1	1
MYO18A	1	1	1	25.0098	1	1	1	29.6296	31.7504	1	1
MYO1E	1	1	1	70.4001	1	1	1	1	1	1	1
MYO5A	40.396	1	1	1	1	1	1	36.3885	52.4793	32.7189	33.9453
MYO5C	1	1	1	1	1	1	1	1	31.1058	1	1
MYO7A	1	1	1	50.4074	1	1	1	1	1	1	52.836
MYO9B	1	24.9241	1	19.8068	27.2605	1	25.0795	1	1	1	23.0666
MZB1	1	1	1	81.9533	1	1	1	1	193.084	1	1
MZT1	1	1	1	43.9033	1	1	1	1	1	1	76.7569
N4BP1	1	1	1	1	1	1	1	1	25.6499	1	1
N4BP2	1	1	1	31.6787	1	39.2078	1	1	1	1	46.0579
NAA16	1	1	84.6679	1	54.0252	69.6416	62.17	43.59	1	71.3525	1
NAA25	1	1	50.0215	1	1	1	1	1	1	1	48.8253
NAA35	1	1	44.5627	1	1	1	1	1	38.8351	1	37.813
NAA40	1	45.359	1	54.5638	1	1	70.2576	1	1	1	1
NAB1	1	1	1	91.4201	1	1	1	1	52.8874	1	82.0436
NAGA	1	1	1	1	1	1	1	1	66.2423	1	51.0509
NAMPT	1	1	1	33.7302	1	1	1	1	130.948	1	50.7768
NANS	1	1	1	1	1	53.9713	1	1	51.3639	81.1343	50.3231
NAPB	1	1	1	1	1	1	80.4335	1	1	1	1
NAPG	1	1	1	1	1	1	1	1	53.6133	1	1
NAPRT	1	1	1	57.3951	1	1	1	1	80.1351	71.722	69.1712
NAT10	64.5573	1	65.1619	43.5379	1	46.6119	1	1	1	1	40.9721
NAT9	1	1	102.022	1	1	82.5773	1	89.849	1	1	1
NAXD	1	48.0234	1	57.8821	1	1	55.0276	1	46.6041	64.4511	45.2019
NBAS	1	42.0219	1	1	1	1	1	28.5153	26.7079	34.1494	1
NBL1	1	1	1	33.341	1	1	1	1	1	1	1
NBPF10	1	14.8049	1	1	1	17.5123	17.4004	15.549	1	15.6439	1
NCALD	42.9078	76.463	1	53.306	1	1	58.6139	1	61.0762	1	47.4773
NCAPD2	1	1	1	50.5464	1	1	1	1	1	1	77.014
NCBP3	1	31.2923	1	27.9664	33.3913	1	38.1258	31.2189	26.1423	1	1
NCDN	1	1	1	1	1	1	1	1	1	1	42.7791
NCF4	1	1	1	114.297	1	60.3791	1	132.155	277.724	237.605	142.229
NCLN	45.742	1	1	37.6263	1	1	52.1143	1	1	1	23.1754
NCOA1	1	1	1	28.1222	1	1	1	1	35.6611	1	35.7515
NCOA7	30.0702	1	1	1	1	25.8823	34.4036	1	1	1	1
NCR1	1	111.743	1	108.231	1	1	1	1	1	1	1
NCR3	95.3833	1	1	1	1	1	1	1	1	1	1
NDC80	1	1	1	62.3749	1	1	1	1	1	103.208	86.1477
NDFIP2	1	1	1	83.4465	1	1	1	1	125.574	1	66.1347
NDUFAF4	1	1	1	1	1	1	50.8957	1	1	1	1
NDUFAF7	1	69.0242	1	77.429	1	82.8444	1	1	57.0044	1	1
NEK1	1	38.9664	30.8935	1	1	1	1	1	30.9077	1	1
NELFA	1	1	45.5822	1	1	1	1	1	1	1	1
NELL2	1	1	453.667	71.2586	73.1863	104.03	1	1	1	1	1
NF2	1	37.2586	1	29.9144	1	1	1	1	39.4007	1	25.6236
NFATC1	1	1	1	37.8747	1	36.8815	1	33.0329	26.5724	1	34.4141
NFATC2IP	1	1	49.6137	1	1	1	29.298	1	1	1	1
NFKB1	1	1	45.852	1	1	43.2001	1	35.1397	34.2072	1	33.881
NFKB2	1	1	1	1	1	1	1	1	37.6155	1	1
NFKBIB	1	1	1	38.7519	1	1	49.727	1	1	1	29.4144
NFKBID	1	1	1	1	1	1	1	1	119.457	1	95.585
NFRKB	1	1	46.2438	1	1	43.8462	1	1	1	1	1
NFS1	1	1	1	1	1	1	1	1	55.4027	75.6089	1
NFYB	1	57.2676	1	48.8315	1	1	66.5887	1	1	72.3878	1
NFYC.AS1	1	1	1	1	1	1	1	1	1	1	21.6334
NHLRC2	1	1	1	28.9496	1	1	1	1	1	1	1
NHLRC3	1	69.0632	84.4159	89.6502	1	53.2179	1	1	1	56.6554	55.6112
NINJ1	189.515	1	133.952	1	126.946	125.604	1	121.682	215.66	153.001	120.485
NINJ2	1	1	1	55.0508	1	1	1	1	126.26	120.391	119.781
NIPSNAP3A	1	85.3315	1	1	1	1	1	1	1	1	1
NISCH	35.2672	33.0944	1	1	1	1	1	37.4688	33.6923	1	42.7854
NKAP	40.8846	1	1	37.6349	1	1	1	1	1	1	31.8826
NKG7	3279.82	9735.2	897.673	6634.82	4304.39	1	7095.65	668.041	1	1	1
NKIRAS2	1	1	1	58.0328	1	1	1	1	1	1	1
NMB	1	1	1	1	1	1	1	1	1	1	165.916
NMD3	56.6473	60.4535	66.2022	47.9771	1	1	1	56.0328	1	63.4023	44.8771
NME6	85.5813	84.1219	1	61.2402	1	68.0203	1	70.0127	57.9824	1	67.5863
NME7	1	1	1	1	1	1	1	1	32.5277	1	1
NMT1	1	1	1	33.0437	1	1	1	1	26.8808	1	34.97
NMUR1	1	48.386	1	1	1	1	1	1	1	1	1
NOA1	1	87.0636	87.5685	1	1	105.991	1	1	1	103.278	1
NOL10	1	1	1	46.8395	1	1	1	1	1	1	1
NOL4L	1	33.6732	54.4848	1	33.3438	54.6621	1	1	1	44.1875	1
NOL9	1	1	1	1	1	1	1	1	1	47.8251	1
NOP14	1	1	1	1	1	47.822	41.9717	1	1	1	1
NOP14.AS1	1	1	1	1	1	1	36.9165	1	1	1	1
NORAD	1	1	37.1154	1	1	1	1	1	25.1307	1	1
NOTCH1	1	1	1	23.894	1	1	1	1	1	1	1
NPDC1	1	1	1	1	1	1	1	1	1	1	40.8462
NPHP3.ACAD11	1	1	60.166	43.4279	1	1	60.3916	1	1	70.0119	1
NPTN	1	30.2573	1	1	1	1	28.3455	1	64.1742	1	1
NQO2	1	1	1	1	1	1	58.4909	1	1	1	1
NR1D1	96.6116	1	1	1	1	1	1	1	1	57.093	1
NR1D2	39.5476	1	1	1	1	1	1	47.0338	1	1	1
NR4A2	66.8982	1	1	514.462	218.108	1	1	72.3752	107.27	1	102.01
NRAS	1	1	1	54.8426	1	1	1	1	45.9554	47.9931	66.5218
NRBF2	1	1	1	70.3348	98.7732	1	111.605	91.0886	68.2091	1	53.4287
NRF1	1	1	36.1742	1	1	1	1	1	1	1	1
NRIP1	42.7147	1	1	1	1	1	1	1	1	1	1
NSF	1	1	1	48.1544	1	1	1	36.9249	59.2529	67.4503	28.1339
NSG1	1	1	75.745	1	1	1	69.9238	1	1	1	1
NSL1	1	1	1	1	1	1	26.8286	1	1	1	1
NSMCE3	1	1	1	68.6084	69.8677	1	95.3532	1	66.4879	1	1
NSRP1	1	1	37.4563	31.9339	57.6856	60.1738	1	1	1	1	55.2065
NSUN3	1	1	1	36.7906	1	59.1359	66.091	1	1	1	1
NSUN5P2	1	1	28.5089	1	1	35.1731	1	1	1	32.2801	1
NSUN6	1	56.0511	60.4563	1	1	56.9206	1	1	55.1696	101	1
NT5E	1	1	40.9648	1	1	1	1	1	1	1	1
NTAN1	1	88.8344	1	86.3209	1	1	63.8994	1	1	96.3828	1
NTPCR	1	1	71.5572	71.7799	1	1	1	1	77.4973	90.0457	68.4905
NUAK2	1	63.8616	102.249	1	1	69.7323	1	1	1	1	1
NUBP1	1	76.0749	1	92.2546	1	1	85.0747	1	100.555	93.3902	108.614
NUDT1	1	1	1	64.1814	1	1	1	1	54.214	1	101.213
NUDT2	1	1	1	73.0572	1	92.4053	1	1	88.6427	1	118.554
NUDT3	1	1	1	1	1	1	48.0856	1	1	1	1
NUFIP2	1	1	1	1	25.6168	26.6644	1	25.8384	1	1	1
NUP133	1	52.7625	1	55.039	1	1	1	58.9343	1	1	1
NUP188	1	37.8716	1	37.6095	1	1	1	1	31.1157	1	34.7036
NUP37	1	90.4231	1	64.4662	1	1	1	1	90.2461	102.131	103.096
NUP43	1	1	53.7808	1	1	51.6805	1	1	1	1	1
NUP58	1	1	1	1	1	1	1	1	1	1	29.3924
NUPL2	1	53.0741	48.8683	42.3895	1	44.7114	1	1	1	1	56.1226
NUSAP1	1	1	1	166.299	1	1	1	1	1	1	153.468
NVL	1	1	1	1	1	55.7749	1	1	52.9625	1	55.2736
NXT1	151.477	1	121.294	91.3086	129.158	115.923	75.7927	106.742	1	1	113.069
OAS1	1	95.6171	1	126.066	91.7987	68.313	105.888	1	277.744	213.471	110.877
OAS3	1	1	1	49.4818	1	1	1	34.3345	67.9266	1	55.9683
OASL	1	307.108	1	476.967	298.2	1	285.52	156.183	203.059	1	473.402
ODF2	1	1	1	1	1	1	1	1	1	1	46.9317
ODF3B	1	1	1	45.1881	1	1	1	1	1	1	38.5865
OGG1	1	47.4135	1	55.1863	59.7927	1	1	46.4579	57.9661	1	73.1797
OLFM2	1	1	1	1	1	1	1	1	1	44.126	1
OMA1	1	1	73.8855	1	1	80.9483	1	1	1	1	1
ORC3	62.7675	1	1	46.226	55.0896	71.4633	1	1	67.0811	91.169	56.9317
ORC5	1	1	1	1	1	67.7788	1	1	1	1	62.1476
ORMDL3	1	1	72.3429	44.1118	1	1	1	1	64.6099	1	1
OSBPL2	1	37.0307	1	1	1	1	1	1	1	1	1
OSBPL5	1	69.4105	1	1	1	1	1	1	1	1	1
OTUD5	1	50.6116	54.8228	36.5828	1	1	1	1	150.57	60.98	48.3247
OXR1	1	1	41.8711	1	36.9439	40.84	1	1	1	1	1
P2RX5	1	1	1	1	1	1	1	1	1	1	57.9461
P4HA1	89.9994	1	1	51.1401	1	1	1	76.6254	111.084	1	85.704
PABPC3	1	1	1	1	1	13.1668	1	1	1	1	1
PAFAH1B3	1	1	1	57.4176	1	1	1	1	74.037	73.9029	75.9398
PAFAH2	64.1969	84.6576	1	1	53.2525	1	102.094	1	1	1	1
PAICS	1	1	60.1782	1	1	1	1	1	1	1	60.6822
PAIP1	36.9141	1	31.2133	1	1	1	1	33.669	1	1	1
PALM2.AKAP2	1	1	1	1	1	1	1	1	1	36.3243	1
PAM16	1	1	1	1	1	1	1	1	53.719	1	60.1135
PANK2	1	52.6059	1	1	1	1	39.6572	1	1	1	1
PANK4	1	1	1	47.0957	1	1	1	1	1	1	38.4875
PAPOLG	1	1	1	1	38.7319	38.9087	1	37.2996	33.3261	1	28.2588
PAPSS1	1	1	1	1	1	1	88.3488	90.153	127.551	145.341	105.272
PARP16	65.7355	1	1	1	1	1	1	1	1	1	1
PARP3	1	1	1	57.83	1	1	1	1	1	1	1
PASK	1	1	51.0445	1	1	48.3871	1	1	1	1	1
PATJ	55.8394	1	48.828	1	1	61.8515	1	49.8077	1	32.8127	1
PATL2	1	441.476	86.4214	96.3521	148.503	66.6231	342.362	62.309	47.152	57.6622	45.1854
PAXBP1	1	1	1	1	1	29.859	1	1	1	1	1
PAXIP1.AS1	1	1	111.686	1	1	1	1	1	1	1	1
PAXIP1.AS2	1	1	112.605	1	1	1	1	1	1	1	1
PBX4	73.5785	1	1	1	1	53.6907	1	93.3997	86.8487	66.007	33.1863
PCBD1	1	1	1	77.8035	1	1	1	1	1	1	1
PCED1A	1	50.1106	46.6224	1	1	1	1	1	1	1	1
PCK2	1	1	1	1	1	1	1	1	75.1573	1	42.3057
PCNT	1	37.4389	24.3766	1	1	1	32.8241	1	1	28.9765	31.2746
PCNX4	1	1	1	1	1	1	1	1	1	1	59.2452
PCYOX1	1	1	58.1281	1	1	1	1	1	1	1	1
PCYOX1L	1	1	1	1	1	1	1	1	52.2379	1	1
PDCD1	1	1	1	1208.34	409.182	1	132.171	154.554	256.218	1	1187.57
PDCL	1	1	1	1	1	1	1	1	43.5986	1	1
PDE12	1	1	1	46.8356	1	1	1	1	1	1	1
PDE4A	1	1	1	1	1	1	1	1	35.7983	1	1
PDE4D	33.864	1	1	1	1	1	1	22.1081	23.1382	1	32.281
PDGFD	1	68.2662	1	1	1	1	1	1	1	1	1
PDHX	1	1	1	54.1897	1	1	1	1	39.1975	1	1
PDK1	1	1	93.4857	1	1	64.2529	1	1	1	67.9302	1
PDK2	1	1	1	1	1	1	44.4675	1	54.1033	1	1
PDK3	41.7936	22.1848	29.5095	1	1	31.0719	1	30.9441	1	26.3428	1
PDLIM7	1	1	1	80.4314	1	1	1	1	43.8114	1	37.5065
PDP1	1	1	1	1	1	1	1	1	1	141.081	1
PECAM1	1	33.2246	49.9604	44.0904	47.2272	1	1	1	1	1	1
PECR	1	1	1	1	1	1	1	1	89.0529	137.039	47.9269
PELI1	1	1	1	1	1	1	1	1	68.7819	40.0512	1
PELO	63.7316	1	1	76.5609	104.669	1	1	74.7919	1	1	1
PERP	64.1844	1	1	1	1	1	1	52.6897	1	1	1
PET117	1	101.539	1	1	1	84.5821	111.087	1	1	1	1
PEX1	43.8781	1	50.1661	1	1	1	1	1	1	1	1
PFDN4	1	1	1	1	1	1	36.2595	1	48.2022	44.9991	41.1871
PFKFB3	57.8466	1	1	41.0626	1	1	1	50.944	84.1196	1	92.2815
PGAM1	1	17.5181	1	24.5657	1	1	1	1	20.7702	1	22.448
PGD	1	1	92.0456	115.862	1	1	1	1	93.2578	1	125.844
PGGHG	87.6309	60.1036	144.381	61.0015	64.4015	78.753	1	60.1459	1	1	1
PGGT1B	1	43.8568	1	45.5165	1	1	70.1454	1	1	1	1
PGM1	1	64.0962	1	72.9956	1	1	1	1	54.4519	1	60.7802
PGM2	1	1	1	49.9627	1	1	1	1	53.3404	1	60.2127
PGRMC1	1	1	1	1	1	1	1	1	1	1	68.4899
PHACTR2	56.3609	1	1	1	1	1	1	33.1989	74.2302	37.7532	38.1042
PHACTR2.AS1	1	1	1	1	1	1	1	1	43.7727	1	1
PHACTR4	1	1	1	1	1	32.6508	1	1	1	1	1
PHEX	1	1	1	59.397	1	1	1	1	1	1	1
PHF1	59.6155	1	52.3084	1	48.8929	45.8507	43.4204	43.3354	1	55.9337	1
PHF10	1	1	1	1	1	44.3836	1	1	1	1	1
PHF12	1	1	1	1	31.4273	1	1	1	1	1	1
PHF19	1	1	1	1	1	1	1	1	30.6532	1	31.6997
PHF21A	1	21.9542	1	1	1	1	19.1361	1	25.8333	26.736	1
PHLDA1	1	1	1	172.893	1	1	1	1	160.692	1	1
PHTF1	1	1	1	29.3386	1	1	1	1	1	1	1
PI16	1	1	1	1	1	1	1	1	1	133.097	1
PI4KA	1	1	1	1	1	1	1	1	1	1	28.5191
PIAS3	50.9202	57.7979	1	61.2035	1	1	1	1	47.1547	1	1
PIAS4	1	74.1158	1	51.8973	1	1	1	1	1	1	1
PIGF	126.938	105.696	85.6409	54.46	71.0384	1	68.0863	1	65.8493	1	1
PIGH	1	91.1041	1	1	1	1	65.0136	1	1	1	1
PIGK	1	1	1	1	1	1	1	1	37.827	52.7425	1
PIGL	84.494	1	68.0455	52.1976	1	73.57	1	1	1	93.1101	48.0512
PIGM	1	1	44.3475	1	1	1	1	1	37.6952	1	1
PIGO	1	1	1	32.3789	1	1	1	1	1	1	1
PIGU	1	1	1	1	1	1	1	1	71.9695	1	94.9405
PIK3AP1	93.4837	50.2972	1	74.7622	46.721	1	1	1	1	1	1
PIK3C3	1	1	1	1	40.6241	35.141	36.534	32.6107	32.6569	1	37.2295
PIK3CG	59.8644	56.8088	1	44.5876	69.482	1	61.0291	61.2309	43.9574	1	42.1644
PIKFYVE	1	1	1	1	1	1	1	1	1	1	24.6412
PIM3	1	1	1	45.9758	57.3581	1	1	61.2939	172.698	92.4605	41.4325
PIN4	1	1	1	1	1	43.2077	1	1	1	1	1
PIP5K1A	1	1	1	1	1	1	1	1	1	1	37.4457
PIPSL	1	1	1	1	1	1	1	1	1	1	14.0145
PISD	50.9594	56.3099	42.5261	44.1226	1	72.2789	1	59.9994	55.033	1	1
PJA1	77.5937	1	1	1	1	1	1	1	1	1	1
PKN2	1	24.018	1	25.0803	32.4398	1	1	1	1	1	1
PLA2G16	74.4912	94.7856	1	153.866	141.618	1	1	1	1	1	97.8678
PLA2G4B	1	1	52.1694	1	1	1	37.6546	1	1	1	1
PLAA	1	49.6054	1	45.254	1	1	1	53.6342	47.9452	1	1
PLAC8	343.81	401.346	503.587	1	85.681	458.575	657.403	154.514	1	1	1
PLCD1	1	1	1	1	1	1	94.1356	1	1	1	1
PLEC	1	1	1	1	1	20.5677	1	1	1	23.3573	1
PLEK	362.721	1111.79	1	175.482	384.326	1	1142.38	177.471	76.1059	1	1
PLEKHA1	64.7429	119.141	81.9962	1	1	75.0722	150.079	1	1	68.5972	1
PLEKHA2	1	1	1	36.2849	34.8815	1	1	34.685	32.4258	1	1
PLEKHB1	1	1	132.489	1	1	110.676	1	1	1	1	1
PLEKHF2	86.2875	1	1	1	1	1	1	1	72.9239	1	1
PLEKHG2	1	1	1	1	1	1	1	1	25.2763	1	1
PLEKHG3	1	53.754	1	1	1	1	71.6756	1	1	1	1
PLEKHO1	1	1	1	1	1	1	1	1	1	1	34.166
PLIN3	1	1	1	49.1127	1	1	1	1	75.3811	1	98.4772
PLK3	1	1	100.704	1	1	94.0957	1	136.623	136.568	135.921	90.6859
PLOD3	1	1	1	1	1	1	78.605	52.8408	47.3777	1	1
PLPP1	1	1	64.0675	211.193	1	1	1	1	87.9107	1	107.154
PLPP5	59.2073	1	1	49.6566	55.0838	1	1	74.0512	90.0548	1	65.8961
PLSCR1	86.2526	1	1	98.4454	55.0105	1	1	1	48.9463	1	75.7398
PLXDC1	1	1	1	1	47.5489	1	1	1	1	1	1
PMAIP1	1	1	1	118.662	1	1	1	1	295.813	1	1
PMM2	1	1	46.1216	1	1	1	1	1	1	1	1
PMPCA	41.0553	1	1	34.6254	1	1	1	38.3625	31.9008	42.756	35.1552
PNMA1	1	1	84.2632	1	1	77.2941	1	1	77.5872	118.539	61.1459
PNO1	1	1	87.7555	1	70.9454	1	1	1	1	1	1
PNPLA3	1	1	25.5754	1	1	1	1	1	1	1	22.547
PNPLA6	39.0079	57.447	1	1	1	1	1	1	1	1	1
PNPT1	1	1	49.5503	40.5455	1	65.1022	66.3828	1	1	66.3609	1
POC1B.GALNT4	41.3825	1	1	1	1	1	1	37.5165	1	1	1
POC5	1	1	1	62.1632	1	1	1	1	1	65.9281	61.9812
POGK	1	1	67.7184	1	1	1	1	1	1	1	1
POGZ	1	1	1	1	1	27.4516	1	1	1	1	1
POLB	1	1	1	65.7949	1	1	1	94.2547	75.6742	1	1
POLD2	69.0664	1	100.237	54.2779	72.5023	86.0615	1	1	1	1	107.794
POLG2	1	57.127	1	1	1	1	86.7311	1	1	1	1
POLH	1	1	1	1	1	1	1	1	1	33.1715	1
POLK	1	1	1	1	1	1	39.5564	37.431	45.1364	1	1
POLM	68.7188	1	72.3792	1	60.9218	51.5113	61.1273	1	1	75.7509	1
POLR1C	106.463	1	84.0251	1	1	93.9759	1	1	1	1	1
POLR2C	84.1341	70.0798	1	44.971	1	1	78.274	1	1	51.2344	81.0498
POLR2D	1	1	1	42.2157	1	1	1	1	1	1	42.59
POLR2M	49.2725	1	44.3841	40.3041	1	51.8143	1	1	1	60.3133	1
POLR3K	1	93.231	1	99.5743	118.292	1	67.9918	1	85.4474	84.5897	165.518
POM121	1	1	18.4183	1	1	21.8811	1	1	1	17.9594	1
PON2	1	1	1	145.402	1	1	1	1	1	1	1
POP7	85.5955	82.5124	1	91.1297	1	1	109.095	1	69.3044	1	72.1112
POR	1	1	1	69.12	91.365	1	1	1	62.6964	70.0261	73.9438
POU2F2	1	1	1	1	1	1	1	1	28.2323	28.2623	1
PP7080	1	1	1	1	1	101.083	1	1	1	1	1
PPAN	69.2532	1	51.4109	1	1	1	1	1	1	1	1
PPDPF	1	1	1	17.5853	1	1	1	1	1	1	1
PPIF	1	1	1	84.89	1	1	54.1065	97.1738	1	1	70.5144
PPIL1	162.739	1	1	1	1	1	1	1	88.8346	1	90.2868
PPME1	1	1	1	69.8514	1	1	1	1	61.3914	1	73.0838
PPP1R15B	54.6522	1	1	57.2898	49.6967	1	42.6379	54.4979	34.5274	1	34.1855
PPP1R16B	1	1	1	49.3922	58.5758	1	1	49.9491	47.7331	1	42.4869
PPP1R18	1	15.2054	1	1	15.7792	1	12.3754	1	1	1	1
PPP1R21	1	1	44.2475	36.6247	40.0093	1	42.9881	42.6966	41.2485	1	25.2978
PPP1R35	86.1001	1	79.0096	1	1	76.6493	71.3937	64.1851	1	78.7803	1
PPP2R1B	1	1	1	36.7375	38.7306	1	40.5086	39.8187	40.1734	1	27.7415
PPP2R2A	1	1	1	1	1	1	1	1	30.7108	1	1
PPP2R2B	64.0683	112.53	1	42.5908	87.3903	1	93.201	47.4973	61.415	1	1
PPP2R5E	1	1	1	1	1	1	36.7596	1	1	1	1
PRAP1	72.1968	1	1	47.3985	1	1	69.0787	1	1	1	1
PRCP	1	1	1	1	1	1	1	1	91.3483	1	1
PRDX4	103.44	1	1	79.5829	1	116.121	137.449	139.826	118.038	145.008	117.58
PREPL	1	1	36.529	1	1	1	34.5539	1	1	1	1
PRG2	1	1	1	54.2379	1	1	1	1	59.038	1	65.5502
PRIM1	1	1	109.334	103.241	1	116.665	1	1	1	124.237	1
PRKAB1	123.474	1	1	77.549	1	1	1	77.209	87.4519	1	72.3498
PRKAG2.AS1	1	1	1	1	1	60.6364	1	1	1	1	1
PRKAR1B	1	1	1	32.4384	1	1	1	1	1	1	1
PRKAR2A	1	1	1	1	1	1	40.8175	1	1	1	1
PRKCA	1	1	32.7607	1	1	35.9806	1	1	1	1	1
PRKCQ.AS1	112.27	89.3616	331.404	64.6157	94.8162	339.685	124.149	141.275	1	213.884	1
PRKRIP1	53.1683	1	1	47.8428	1	1	51.4636	1	1	1	1
PRKX	1	33.0624	37.6502	1	39.6072	1	29.7287	46.3514	1	1	26.9163
PRKY	34.6305	32.63	47.3756	1	1	45.441	33.9702	33.3642	1	1	1
PRMT7	1	1	65.9082	50.056	1	63.779	59.9283	1	1	1	1
PROK2	1	77.7338	1	1	1	1	82.759	1	1	1	1
PRPF40B	1	1	1	1	1	1	1	1	58.5664	1	1
PRPS2	1	1	84.6519	89.9131	1	75.5077	1	1	65.9676	1	88.4501
PRR14	1	1	1	24.9098	1	1	1	1	1	1	1
PRR5	88.9086	53.3609	1	1	1	1	35.5347	1	1	1	1
PRR5.ARHGAP8	53.4418	33.1454	1	1	1	1	1	1	1	1	1
PRR5L	1	92.5398	1	69.5315	64.4467	1	119.831	56.0686	1	1	73.421
PRRC1	1	31.5463	1	1	1	36.7037	1	40.1976	30.7103	1	1
PRSS23	1	172.541	1	1	1	1	130.277	1	1	1	1
PRUNE1	1	80.3925	1	1	1	1	1	1	1	1	1
PSEN1	1	1	1	1	1	1	1	1	56.6779	42.3871	29.9474
PSMC1	1	46.6837	1	1	1	1	1	53.3938	1	1	36.1925
PSMD5.AS1	1	1	1	29.1896	1	39.7781	1	1	1	46.6084	51.1932
PSMD6.AS2	1	1	78.8263	1	1	68.516	58.686	1	1	109.017	1
PSME4	1	1	1	24.4986	38.247	1	28.6641	38.3309	36.7508	1	30.118
PSMG1	1	1	1	81.3495	1	1	1	1	95.496	1	1
PSMG4	1	1	57.33	1	1	56.8597	1	1	1	1	1
PTCH1	1	1	1	1	1	1	46.1625	1	1	1	1
PTER	1	1	1	1	1	1	1	1	61.3462	85.6128	1
PTGDR	113.338	164.042	1	1	132.452	1	123.535	136.661	1	1	1
PTGDS	1	1	1	1	1	1	36.7747	1	1	1	1
PTGES3L.AARSD1	1	1	60.8431	1	1	1	1	1	1	1	1
PTMS	1	1	1	82.0632	1	1	1	1	1	1	1
PTP4A3	1	1	1	1	1	1	1	1	219.195	1	1
PTPN11	1	1	1	59.0364	1	27.0365	1	1	31.1983	1	65.351
PTPRE	34.7236	53.4598	1	26.9156	39.2919	1	48.6922	32.1098	1	1	1
PTRH1	1	43.1957	1	1	1	1	55.2798	1	1	1	1
PTTG1	1	65.2248	1	335.286	236.17	1	115.685	170.079	499.367	113.405	561.223
PUS7L	1	1	1	1	1	48.9765	1	1	1	1	32.9142
PUSL1	27.113	1	1	1	1	1	1	1	1	35.6543	1
PVT1	1	1	73.0853	48.7236	1	71.6503	1	67.7146	104.4	87.6117	73.7885
PWARSN	1	1	125.124	1	1	137.682	1	1	1	1	1
PWP2	93.1571	1	1	1	64.139	1	1	63.6601	1	1	1
PXK	1	68.7886	1	1	1	1	1	1	84.0441	1	1
PYGB	1	46.0616	59.1983	47.213	1	1	49.8459	1	46.7264	49.1119	1
PZP	96.0385	69.4174	1	1	51.7528	1	73.1681	49.4741	1	1	1
QDPR	1	1	1	1	1	1	78.7753	1	1	1	56.2501
QSOX1	1	1	1	50.8757	1	1	1	1	40.2176	1	60.5203
QTRT1	1	97.1634	162.459	69.4651	1	132.811	1	93.5188	88.6994	1	99.0377
R3HCC1L	1	1	1	44.0933	1	1	66.2665	1	52.1432	1	1
R3HDM1	1	29.3675	1	46.6311	1	1	1	40.7474	45.3768	50.7571	45.4111
RAB11FIP1	34.0438	1	1	28.7562	1	1	1	29.3843	60.4802	1	48.4478
RAB11FIP4	1	1	1	30.4623	1	1	1	1	1	1	1
RAB22A	1	31.4375	1	1	1	1	1	1	1	1	1
RAB24	95.8975	116.976	117.188	96.5956	108.738	91.587	72.028	80.0204	1	1	1
RAB27A	139.482	144.52	1	263.364	155.123	1	120.367	76.8145	83.6704	1	147.421
RAB2B	1	1	1	1	1	1	1	1	1	1	39.3132
RAB30	1	1	1	1	1	1	1	1	47.5231	1	1
RAB30.AS1	1	1	1	1	1	1	1	1	1	140.065	41.8035
RAB33A	1	1	1	46.8206	1	1	1	1	73.5318	1	57.9215
RAB33B	45.312	1	1	1	1	1	1	1	1	1	1
RAB35	1	47.1396	1	54.6375	37.0265	1	1	40.2305	37.0639	1	66.5048
RAB3GAP1	1	1	30.0858	1	1	51.3148	1	1	31.5419	1	30.1807
RAB4A	1	54.5271	1	1	1	1	1	1	1	1	1
RABEPK	1	1	49.7471	1	1	1	1	1	1	1	1
RABIF	1	51.1638	1	31.8922	1	1	1	1	1	1	44.8839
RABL3	1	1	1	1	1	61.1977	1	1	1	62.8267	38.2009
RAD51C	1	1	1	38.2748	1	1	1	1	1	1	52.427
RAD52	1	1	1	1	1	1	1	1	1	33.0589	1
RALB	1	1	1	90.8657	1	1	91.0904	1	104.787	1	68.3111
RALGAPB	1	1	1	1	1	1	31.8852	28.406	1	1	1
RANBP6	1	1	67.9362	1	1	1	1	1	1	1	1
RANBP9	1	1	1	1	1	1	1	1	68.9098	49.155	1
RANGAP1	1	1	1	1	1	1	1	1	41.632	1	45.4416
RAP1GAP2	1	43.7048	1	1	1	1	58.1991	1	1	1	1
RAP2C	52.7663	62.5957	1	58.3757	54.31	1	1	51.9466	52.9027	1	53.3242
RAPGEF1	1	28.9522	1	37.5148	25.8526	1	31.583	30.9385	1	1	38.6293
RARG	68.0997	1	1	1	1	1	1	1	1	1	1
RASA3	40.7435	129.814	89.2551	1	50.3163	142.641	142.627	47.4051	1	162.182	1
RASGRF2	30.0098	1	34.2854	1	1	28.185	1	1	1	1	1
RASGRP2	33.9502	57.6476	100.829	1	1	99.6638	93.8425	31.8909	1	103.478	1
RASSF2	46.3542	1	1	1	42.8886	47.9829	1	61.0887	1	1	48.2234
RASSF3	1	23.9681	33.0679	1	1	38.7752	23.8754	1	1	42.4613	1
RAVER1	1	42.1741	44.3965	58.6229	41.0552	1	47.708	1	34.3218	1	1
RBAK.RBAKDN	1	1	38.3341	1	1	44.7874	1	1	1	1	1
RBBP6	1	1	24.2284	1	1	1	1	1	1	1	1
RBL1	1	36.0297	1	35.56	1	53.2944	53.67	1	1	60.038	39.7018
RBM18	64.1194	81.8241	1	48.7371	74.632	1	74.8123	1	56.9347	1	62.0047
RBM28	1	1	1	46.5436	1	1	1	1	1	1	1
RBM33	1	1	40.6015	1	24.4712	28.7859	1	28.1189	22.4361	1	23.9011
RBM38	1	1	1	1	1	1	1	1	60.897	49.1399	1
RBM45	1	1	1	1	1	1	1	1	1	1	102.887
RBM4B	71.1806	64.0925	1	1	1	53.6805	1	62.0888	52.9215	1	1
RBM7	95.8884	1	1	67.494	1	1	77.4554	82.0577	78.525	1	1
RBMS1	49.5967	22.5242	25.5114	1	1	37.1887	28.8383	37.8884	1	1	1
RC3H2	1	32.1091	1	28.8269	47.1521	1	51.1539	32.8287	29.3695	39.7206	1
RCBTB1	1	1	1	1	1	1	1	1	69.977	1	1
RCBTB2	1	96.1344	1	1	1	84.4073	95.387	1	1	68.0408	1
RCE1	1	1	1	1	1	1	1	1	1	1	45.7298
RCHY1	1	1	1	1	1	1	1	1	48.4578	1	1
RCOR3	1	1	46.4024	34.98	1	42.4807	1	1	35.1982	47.7148	32.3672
RDH14	82.3615	1	1	1	1	1	1	1	1	1	1
RDX	1	1	1	1	1	1	1	1	31.2488	31.3691	1
REC8	118.725	1	1	147.665	1	1	1	1	101.99	1	59.2052
REEP3	1	1	1	1	1	1	1	44.4943	1	1	1
REEP4	1	99.2254	1	1	1	1	99.9795	74.6571	1	1	104.699
RELB	1	1	1	1	1	1	1	1	44.5585	1	1
RELL1	74.1535	1	52.7905	41.778	60.4964	1	34.7533	69.9589	1	1	1
RELL2	1	1	32.3988	29.4503	45.9479	51.0178	32.6703	33.9798	1	67.3603	1
REPS1	48.5335	1	1	1	1	1	1	40.2175	1	1	1
RERE	1	1	1	1	1	22.4108	1	1	1	1	1
REREP3	1	1	1	1	1	1	1	1	246.584	229.746	1
REV3L	28.8038	1	25.5855	1	1	29.1241	1	31.3974	29.2875	34.0962	1
RFC2	1	1	1	110.656	1	1	1	1	77.1236	1	96.0122
RFC4	49.0632	1	1	78.8137	65.3199	1	1	1	1	72.0336	71.3916
RFC5	1	1	1	1	1	1	1	1	1	1	77.17
RFLNB	1	1	1	1	1	1	1	47.1037	1	1	1
RFWD2	1	1	1	42.1919	1	60.8052	63.7381	60.2929	39.251	1	45.4609
RFWD3	1	1	65.3948	37.676	1	1	1	1	46.6447	1	52.4634
RFX3	1	1	1	1	1	1	1	1	1	54.8452	1
RFX7	1	1	1	26.8379	1	1	1	1	29.8749	1	1
RGS1	396.855	157.035	1	5662.03	3557.28	1	163.986	1618.05	4388.83	411.155	6486.53
RGS2	477.906	1	1	978.036	424.926	1	1	164.851	148.374	1	616.503
RGS3	1	32.4581	1	39.2833	1	1	1	1	1	1	1
RHBDD1	1	1	1	1	1	1	1	1	41.1837	1	1
RHBDF2	1	46.8096	1	1	1	1	30.7006	1	1	1	1
RHOC	163.903	97.8733	1	161.442	144.328	1	58.0504	146.346	264.717	1	129.905
RIC3	1	1	25.2627	1	1	32.173	1	1	1	1	1
RIN3	1	1	1	40.4623	1	1	1	1	32.2108	47.6576	1
RIOK1	76.3376	70.5029	1	75.2227	1	1	88.5101	1	62.3018	1	62.5583
RIOK2	1	1	50.656	1	1	1	1	1	1	1	1
RIPK1	49.2568	45.6794	48.33	30.1883	1	1	47.0838	46.6345	1	1	1
RLF	1	35.9647	1	31.3354	1	1	32.8089	1	34.2447	1	30.6313
RLIM	1	1	26.5758	24.1029	1	29.9349	1	28.1727	1	31.4661	1
RMDN3	62.724	53.5677	1	1	76.5766	1	69.4509	69.6299	1	1	1
RMND5A	1	47.3046	1	43.5127	1	1	33.2812	1	1	31.2661	1
RNASEH2A	1	1	1	76.6166	1	1	1	1	1	1	86.9246
RNF11	66.6262	54.6852	1	1	1	1	56.9317	1	37.8981	1	1
RNF111	1	1	1	1	1	1	1	1	29.7816	35.3236	32.0977
RNF123	1	1	1	41.9257	1	1	1	1	1	1	1
RNF139	1	77.6851	62.2366	53.5737	84.2361	1	113.178	58.5302	58.3669	99.74	1
RNF14	1	1	1	1	1	1	72.1876	1	1	1	1
RNF141	1	1	1	1	1	1	1	1	40.6762	1	1
RNF145	1	1	1	1	1	1	1	1	29.641	1	1
RNF214	1	1	75.4055	1	72.9388	90.5169	1	94.0533	1	226.037	44.4169
RNF216P1	1	1	47.4699	1	1	56.0313	1	1	1	51.437	1
RNF220	1	1	1	1	1	1	1	1	1	45.6372	1
RNF26	1	80.3836	1	1	1	1	1	1	1	1	1
RNF38	1	1	54.9074	30.1088	50.1771	1	37.5055	50.234	1	1	1
RNF40	1	37.8797	1	30.4123	38.1266	1	29.8962	1	1	1	1
RNF41	1	1	1	36.6478	1	1	1	1	37.0263	1	1
RNGTT	1	1	1	37.7485	47.9857	41.5742	1	54.6439	63.5073	66.7624	38.2201
RNMT	33.7799	1	38.9917	1	1	39.7619	1	47.8349	37.8735	1	1
RNPEP	1	63.2962	1	1	1	1	85.4402	1	1	1	1
RNPEPL1	50.4869	65.8089	63.6487	1	1	45.4787	82.5537	1	45.4406	69.8788	1
RORC	191.667	1	1	1	1	1	1	1	1	1	1
RPAP1	1	1	34.465	1	1	1	1	1	1	1	1
RPAP3	1	47.4208	41.6495	1	1	49.5012	1	1	1	1	1
RPARP.AS1	83.1847	1	95.654	1	1	95.4662	1	1	1	1	1
RPE	1	74.1502	1	52.3495	1	1	64.3385	1	1	1	1
RPF2	97.0924	1	119.67	1	1	1	1	91.8991	1	1	1
RPIA	72.2021	1	1	1	1	1	1	1	1	1	1
RPL19P12	1	1	1	1	1	13.4005	1	1	1	1	1
RPL22L1	1	1	1	1	1	1	1	1	36.087	1	1
RPL32P3	1	1	1	1	1	29.4767	1	1	1	1	1
RPL7	58.5325	1	26.4526	1	1	50.4748	27.4008	56.5417	1	50.3251	39.9199
RPP25L	117.897	85.506	1	85.9893	1	86.6286	1	1	70.4016	1	74.4138
RPP38	86.8378	97.8014	1	1	1	1	1	1	1	1	58.714
RPS26	1	63.0146	67.0615	50.005	1	54.7565	1	1	59.2082	1	1
RPS6KA5	81.6465	1	1	1	43.2786	45.2613	1	66.5595	77.0515	58.7235	42.4034
RPUSD1	1	1	1	57.7722	1	1	1	1	1	1	1
RRAGC	1	39.6719	1	25.9216	1	1	33.3629	31.8564	29.9235	1	23.3646
RRM2	1	1	1	1	1	1	1	1	1	1	258.466
RRN3P2	1	33.1919	1	43.9073	58.101	1	33.4762	1	42.6074	51.7859	65.7083
RRN3P3	1	1	1	1	1	1	1	1	1	1	27.812
RRP36	1	106.062	1	1	1	1	134.265	1	1	105.601	60.217
RRP8	68.8523	1	115.571	1	1	1	1	1	1	1	1
RRS1	1	1	92.4969	1	1	1	1	1	1	1	1
RSAD1	75.176	58.346	67.9946	65.4736	92.8232	91.012	71.7973	1	1	94.7091	1
RSC1A1	1	1	1	65.8913	1	1	1	1	1	1	1
RSPRY1	88.4792	1	82.9437	43.3604	1	1	1	1	61.7673	1	1
RTKN2	1	1	1	1	1	1	1	1	110.099	139.542	1
RUNX1.IT1	80.2801	100.076	1	1	81.4787	84.0122	58.8864	106.259	1	91.4162	61.8539
RUNX2	97.4493	1	51.2895	1	1	1	1	41.6337	1	1	1
RUNX3	63.0348	88.946	50.5282	79.5279	92.8864	1	76.9146	58.6824	44.5125	1	1
RUVBL2	108.485	80.0764	76.9031	90.502	112.432	1	1	67.97	83.1827	1	111.234
RWDD2B	1	1	71.2005	1	1	1	1	1	1	1	1
RWDD3	1	1	58.428	54.3491	1	60.2683	1	1	1	1	1
S100PBP	1	1	1	42.9264	36.3569	1	1	31.2724	1	1	31.392
S1PR1	122.709	397.353	338.989	1	93.827	355.128	555.272	125.402	1	266.888	1
S1PR2	1	1	1	1	1	1	1	1	46.6834	1	1
S1PR5	217.292	461.207	1	1	95.4932	1	404.525	1	1	1	1
SAAL1	1	1	1	1	1	1	1	1	1	1	61.503
SAP130	1	35.7756	1	43.4734	43.6152	1	38.3531	1	1	1	29.5501
SARDH	1	1	1	79.8897	1	1	1	1	37.9147	1	58.3814
SARM1	1	1	29.3607	1	1	1	1	1	1	1	1
SART1	1	1	1	1	1	1	37.753	1	1	1	1
SART3	38.7593	1	51.1564	39.7476	36.1362	1	1	1	1	1	36.0517
SAT2	146.596	97.1829	159.068	88.688	97.7514	123.935	1	1	75.4879	68.4906	1
SATB1	186.876	33.6209	192.012	1	1	149.517	60.3945	91.9998	1	1	1
SBDSP1	123.671	79.8855	118.949	1	121.057	135.531	76.1774	125.501	1	99.4732	1
SBF1	1	1	22.1198	26.0146	1	1	1	1	1	1	1
SCAP	1	49.5601	48.1952	46.2064	60.6308	55.551	1	1	41.2436	53.3612	1
SCAPER	30.9241	1	29.3872	33.9961	36.6654	38.7611	1	39.3486	1	1	41.7145
SCARNA21	1	1	1	1	1	154.541	1	1	1	1	1
SCARNA9	1	1	74.666	166.788	1	99.464	1	1	1	89.9249	74.4034
SCCPDH	1	1	1	80.885	1	1	1	1	1	1	1
SCLT1	1	1	1	1	1	1	1	1	1	1	24.686
SCLY	1	1	1	51.7204	1	1	1	1	1	1	1
SCO1	1	94.4237	110.389	64.5155	1	1	1	1	86.1314	1	76.4384
SCOC	91.362	99.2311	127.768	1	1	84.018	112.854	99.5506	1	1	1
SCPEP1	1	1	1	95.6919	1	1	1	1	1	1	1
SCRN2	127.442	95.6901	97.1737	98.7476	112.783	99.7096	80.2322	99.5135	1	1	1
SDC4	1	1	1	1	1	1	1	1	224.006	1	66.3107
SDCCAG8	1	1	61.008	1	1	56.6005	1	1	1	54.2183	22.1357
SDHAF1	1	1	1	98.1857	1	89.9267	1	1	65.7954	71.4005	56.7836
SEC14L1	1	1	1	1	1	1	1	1	46.598	1	28.934
SEC23IP	1	40.7529	1	32.8049	1	1	1	1	34.4724	45.8633	1
SEC63	33.7477	1	1	1	1	1	1	1	1	1	27.5173
SEL1L3	69.0963	1	1	97.4991	77.1303	1	1	83.8035	87.6981	81.1321	75.7786
SELENOM	68.0121	1	80.6118	1	75.8011	129.87	1	82.2967	79.1991	84.9649	1
SELL	1	306.095	2256.34	1	194.733	2119.98	396.068	1	674.791	2542.31	110.635
SEMA4A	1	1	1	76.2643	1	1	1	1	1	1	1
2020-09-11	1	1	1	29.4219	38.794	1	1	56.0088	48.7929	1	32.7347
SEPT7P2	1	1	1	1	1	36.5948	1	1	1	45.3768	38.4481
SERGEF	1	77.3432	1	1	1	1	68.6377	80.4502	1	78.521	1
SERHL2	1	1	33.9869	1	1	1	1	1	1	1	1
SERINC5	1	1	154.693	37.5185	1	155.126	38.0145	61.6825	1	75.0305	65.7976
SERPINB6	1	38.0161	1	1	1	1	28.936	1	1	1	1
SERPINE2	1	1	1	1	1	1	1	1	132.621	1	1
SERTAD1	1	1	1	78.4477	1	1	93.9342	1	1	1	1
SESN1	398.487	56.6525	125.812	1	123.543	164.541	67.451	237.016	57.4449	94.7949	1
SESN3	1	1	43.0349	1	1	52.7579	1	1	1	37.8978	1
SETD3	38.3065	39.2769	1	1	40.9018	1	42.63	45.9674	1	1	1
SETD5	1	1	1	24.5851	1	1	1	33.6579	1	1	1
SETDB1	1	1	1	1	1	1	1	1	1	39.2632	1
SETDB2	1	1	1	22.1063	1	40.2651	1	1	35.6716	38.9964	1
SFMBT2	1	1	1	26.1992	1	1	1	1	1	1	1
SFXN3	1	1	1	44.4167	1	1	64.9102	1	81.292	1	32.2545
SFXN4	1	1	1	1	1	1	1	1	1	1	64.0084
SGK3	57.6549	1	1	1	1	1	1	1	1	1	1
SGMS1	1	1	1	37.2267	45.9107	31.6299	1	1	70.3408	81.647	1
SGPL1	1	49.3317	1	38.7716	1	1	47.763	1	1	1	1
SGPP1	1	1	1	1	1	1	1	1	66.7985	67.9335	1
SGTA	68.0984	54.2086	1	68.0297	1	1	97.0229	1	62.6454	73.3836	90.5417
SGTB	1	1	64.8152	1	1	51.1767	1	44.8168	44.5626	73.8144	1
SH2D3A	52.012	1	63.1486	1	1	75.7959	1	43.5329	1	1	1
SH3BP2	1	26.9782	1	1	1	1	27.0418	1	1	19.6471	1
SH3BP5	52.3937	166.829	117.175	1	68.5249	99.1462	216.218	102.541	1	111.139	1
SH3TC1	1	1	1	1	1	1	1	1	33.1592	1	29.4394
SH3YL1	1	1	52.0183	1	1	48.8949	1	1	1	58.1438	1
SHMT2	65.3059	1	1	80.9	1	1	1	58.7421	91.4296	301.618	119.571
SHPRH	1	1	1	1	1	25.3993	1	1	1	24.0006	1
SIGLEC17P	1	156.458	1	1	1	1	1	1	1	1	1
SIPA1	91.9392	68.1782	36.9976	56.6857	81.4951	1	64.2422	53.0603	1	53.52	1
SIPA1L1	1	1	1	28.5867	1	1	1	1	1	1	1
SIRT3	27.6211	1	1	1	1	1	1	1	1	1	1
SIRT6	1	1	1	1	1	1	60.4894	1	42.4324	1	1
SKAP2	125.965	69.7426	1	1	1	1	66.2134	1	78.3221	77.9169	1
SKIL	33.3199	1	1	35.1522	56.8343	1	1	42.1811	30.941	1	48.5746
SLAIN2	1	1	1	25.2497	1	1	1	1	26.9705	31.4252	19.9733
SLAMF7	600.618	601.961	142.042	445.169	703.574	1	476.588	218.542	1	1	1
SLC10A3	77.3268	1	1	1	1	1	66.3044	1	1	1	1
SLC12A6	1	1	25.7768	16.393	1	30.2802	1	1	45.071	39.5796	1
SLC12A7	1	1	1	1	1	1	1	1	1	37.3983	1
SLC12A8	1	25.6892	27.808	1	1	1	1	1	1	1	1
SLC15A4	1	74.4572	1	1	1	1	1	1	1	1	1
SLC16A1	1	1	1	1	1	1	1	1	64.6226	52.4701	1
SLC17A5	1	1	1	1	1	1	1	1	55.2382	1	1
SLC1A5	1	1	1	56.7149	1	1	53.1369	61.8814	67.1727	58.0374	52.7759
SLC25A1	1	65.736	1	78.9601	84.2281	1	69.9962	1	1	1	64.3986
SLC25A10	1	1	1	40.7569	39.4451	1	1	1	1	1	40.703
SLC25A12	1	1	49.4456	67.0046	1	1	1	1	40.6225	1	52.807
SLC25A20	84.7601	132.875	1	62.9558	1	1	149.581	1	1	1	1
SLC25A24	1	70.3336	1	45.2678	56.8294	1	64.6179	1	54.3621	72.5474	54.3601
SLC25A37	1	1	37.2257	1	1	1	1	1	1	1	1
SLC25A40	1	1	1	1	1	1	1	1	1	1	43.4795
SLC25A44	1	1	1	60.6117	1	1	1	73.2048	57.6878	87.0923	54.0964
SLC27A2	1	1	1	77.001	1	1	1	1	1	1	1
SLC27A3	1	1	1	49.9988	1	1	1	1	1	1	1
SLC2A8	1	1	1	64.8096	1	1	1	1	1	1	1
SLC30A5	46.4045	1	1	1	1	1	1	1	1	1	1
SLC33A1	70.858	1	1	1	53.618	1	53.7152	1	1	1	1
SLC35A1	1	62.8937	83.0744	1	1	91.7524	128.92	1	63.0526	79.3953	1
SLC35B2	119.137	139.802	108.788	90.1992	112.284	1	89.8131	1	84.5553	1	1
SLC35D1	1	1	1	1	1	1	1	1	30.6999	1	1
SLC35E2	1	1	1	1	1	1	1	1	1	25.2417	1
SLC35F2	1	1	1	1	1	1	1	1	55.1319	1	1
SLC37A4	1	1	1	1	1	1	1	1	1	1	87.3435
SLC38A5	1	1	1	54.0759	1	1	1	1	1	1	1
SLC39A1	47.3863	1	1	67.8644	1	1	1	1	89.0693	1	76.1255
SLC39A10	1	1	66.496	1	1	1	1	1	1	43.6018	1
SLC39A13	1	1	1	1	1	1	1	1	1	47.189	1
SLC39A3	1	1	1	31.816	1	1	1	1	33.4369	1	37.713
SLC39A6	1	1	1	54.6059	1	1	1	1	62.8795	1	1
SLC39A8	1	1	41.03	1	1	1	1	53.4777	1	1	1
SLC39A9	1	1	1	33.1914	1	1	1	1	35.8849	1	1
SLC40A1	1	1	1	1	1	111.643	1	1	1	1	1
SLC41A1	1	1	1	43.7596	1	1	1	1	89.1518	1	42.2407
SLC41A3	1	1	1	1	1	1	1	1	60.2076	1	1
SLC43A3	1	1	1	68.0317	1	1	1	1	79.1234	1	82.1958
SLC46A3	1	61.2989	62.0332	1	1	1	1	1	1	57.7242	1
SLC4A10	475.392	1	1	1	1	1	1	1	1	1	1
SLC50A1	1	77.7809	102.354	108.056	1	91.7198	62.4516	1	97.2974	1	66.4104
SLC52A2	1	1	72.8882	1	1	1	60.4385	1	1	1	1
SLC5A2	1	1	40.6577	1	1	1	1	1	1	1	1
SLC5A3	1	18.6703	22.2659	24.9745	1	1	1	30.5731	34.9333	1	33.2497
SLC6A6	1	1	1	1	1	1	1	1	27.0993	1	27.9186
SLC7A5	1	1	1	35.4548	1	1	1	1	36.5183	1	1
SLC7A5P1	1	1	1	47.5401	1	1	1	1	1	1	1
SLC7A5P2	1	1	51.485	25.4733	1	1	1	27.2655	29.0988	1	1
SLC8B1	1	1	96.7353	1	1	89.3406	1	1	1	70.3031	1
SLC9A8	1	1	1	1	1	1	1	1	26.5781	1	27.9539
SLC9A9	1	1	1	51.7797	52.143	49.3917	1	61.9032	53.9662	65.6735	116.093
SLC9B1	1	1	1	30.1887	1	1	1	1	38.0656	1	37.654
SLF1	1	1	44.9201	56.5666	88.6744	1	45.5921	87.5078	1	1	39.786
SLFN11	1	1	1	30.3461	44.9132	1	1	1	1	1	34.677
SLFN13	1	1	1	28.7547	22.1024	1	1	1	1	1	28.4596
SLK	54.6245	1	31.1954	21.4855	48.6685	30.5493	31.4301	60.1203	32.098	1	1
SLMAP	1	1	1	1	30.4273	1	1	1	1	1	24.7087
SMAD3	39.4522	1	1	1	1	1	44.2595	29.7671	1	1	1
SMARCA4	1	1	32.6817	1	1	1	1	1	1	1	1
SMARCAL1	1	1	1	1	1	1	1	1	1	1	48.1428
SMC2	1	1	1	1	1	1	1	1	1	1	39.7574
SMC6	1	1	1	37.4051	35.631	1	1	1	47.4235	64.5115	33.8505
SMCO4	1	1	1	1	1	1	1	1	1	1	106.347
SMG5	44.7686	1	1	59.9133	54.0651	1	66.49	50.0944	44.2255	1	30.9649
SMG7	1	36.0008	1	38.7979	39.2699	35.9889	1	41.4097	37.132	1	33.4982
SMIM11A	65.5945	58.1456	74.5867	1	1	64.706	1	62.0637	1	56.9846	1
SMIM14	116.764	1	112.814	1	1	1	167.023	1	1	1	1
SMIM20	105.457	1	1	59.9699	1	118.618	1	1	1	1	85.5531
SMYD2	107.085	1	91.8247	1	147.727	94.7804	134.835	112.569	1	133.439	81.0612
SMYD3	1	1	1	1	1	1	1	1	57.9799	1	1
SNAI3	1	1	1	1	1	1	1	82.6558	1	114.82	1
[truncated: 530 more rows]
